# Supplementary material for: Oryza sativa L. Indica Seed Coat Ameliorated Concanavalin A—Induced Acute Hepatitis in Mice via MDM2/p53 and PKCα/MAPK1 Signaling Pathways
Source: MDPI journal article supplement (doi:10.3390/ijms241914503), 2023-09-25
Supplement: s1 [file s1]

**Table S1. Compounds of *Oryza sativa L. indica*.** 38 compounds of *Oryza sativa L. indica* were retrieved in CAS SciFinder database and PubChem database.

| Compound                                                  | CAS ID     | Molecular Formula | Molecular Weight | Reference                                 |
|-----------------------------------------------------------|------------|-------------------|------------------|-------------------------------------------|
| (2Z) -3-pentyl-2,4-Pentadien-1-ol                         | 149-91-7   | C10H18O           | 154.25           | DOI:10.13271/j.mpb.019.006867             |
| (E) -2-Hexenal                                            | 6728-26-3  | C6H10O            | 98.14            | DOI:10.13271/j.mpb.019.006867             |
| (E) -2-Nonenal                                            | 18829-56-6 | C9H16O            | 140.22           | DOI:10.13271/j.mpb.019.006867             |
| (E) -2-Octenal                                            | 2548-87-0  | C8H14O            | 126.2            | DOI:10.13271/j.mpb.019.006867             |
| (E,Z)-3,6-Nonadien-1-ol                                   | 1632-73-1  | C9H16O            | 140.22           | DOI:10.13271/j.mpb.019.006867             |
| (R)-(-)-(Z)-14-methyl-8-hexadecen-1-ol                    | 481-34-5   | C17H34O           | 254.5            | DOI:10.13271/j.mpb.019.006867             |
| (Z)-2-Octene                                              | 7642-04-8  | C8H16             | 112.21           | DOI:10.13271/j.mpb.019.006867             |
| 1-Nonanol                                                 | 520-18-3   | C9H20O            | 144.25           | DOI:10.13271/j.mpb.019.006867             |
| 1-Octen-3-ol                                              | 527-35-5   | C8H16O            | 128.21           | DOI:10.13271/j.mpb.019.006867             |
| 2,2,5-Trimethylhexane                                     | 3522-94-9  | C9H20             | 128.25           | DOI:10.13271/j.mpb.019.006867             |
| 2,6,6-trimethyl-1-Cyclohexene-1-carboxaldehyde            | 432-25-7   | C5H10O            | 152.23           | DOI:10.13271/j.mpb.019.006867             |
| 3-Isopropylidene-5-methyl-hex-4-en-2-one                  |            | C10H16O           | 152.23           | DOI:10.13271/j.mpb.019.006867             |
| 3-Methylbutanal                                           | 590-86-3   | C5H10O            | 86.13            | DOI:10.13271/j.mpb.019.006867             |
| 3-t-Butyl-oct-6-en-1-ol                                   |            | C12H24O           | 184.32           | DOI:10.13271/j.mpb.019.006867             |
| 4-tert-Butylbenzoic acid                                  |            | C11H14O2          | 178.23           | DOI:10.13271/j.mpb.019.006867             |
| 5,9,13-trimethyl-4,8,12-Tetradecatrienal                  | 6040-06-8  | C17H28O           | 248.4            | DOI:10.13271/j.mpb.019.006867             |
| 6,10,14-trimethyl-2-Pentadecanone                         | 502-69-2   | C18H36O           | 268.5            | DOI:10.13271/j.mpb.019.006867             |
| 6-methyl-5-Hepten-2-one                                   | 110-93-0   | C8H14O            | 126.2            | DOI:10.13271/j.mpb.019.006867             |
| 7,9-Di-tert-butyl-1-oxaspiro(4,5)deca-6,9-diene-2,8-dione | 82304-66-3 | C17H24O3          | 276.4            | DOI:10.13271/j.mpb.019.006867             |
| Alpha-copaene                                             | 3856-25-5  | C15H24            | 204.35           | DOI:10.13271/j.mpb.019.006867             |
| Caffeic acid                                              | 331-39-5   | C9H8O4            | 180.16           | DOI:10.13652/j.issn.1003-5788.2017.04.006 |
| Chlorogenic acid                                          | 327-97-9   | C16H18O9          | 354.31           | DOI:10.13652/j.issn.1003-5788.2017.04.006 |
| Cyanidin-3-O-glucoside                                    | 7084-24-4  | C21H21ClO11       | 484.8            | DOI:10.13652/j.issn.1003-5788.2017.04.006 |
| Cyclohexanol                                              | 970-73-0   | C6H12O            | 100.16           | DOI:10.13271/j.mpb.019.006867             |
| Dodecanal                                                 | 112-54-9   | C5H10O            | 184.32           | DOI:10.13271/j.mpb.019.006867             |
| Formic acid, 2,4,4-trimethylpentyl ester                  |            | C9H18O2           | 158.24           | DOI:10.13271/j.mpb.019.006867             |
| Heptanal                                                  | 111-71-7   | C7H14O            | 114.19           | DOI:10.13271/j.mpb.019.006867             |
| Hexadecanal                                               | 629-80-1   | C16H32O           | 240.42           | DOI:10.13271/j.mpb.019.006867             |
| Hexadecanoic acid,15-methyl-, methyl ester                | 6929-04-0  | C18H36O2          | 284.5            | DOI:10.13271/j.mpb.019.006867             |
| Pentadecanal                                              | 2765-11-9  | C6H10O            | 226.4            | DOI:10.13271/j.mpb.019.006867             |
| Protocatechuic acid                                       | 99-50-3    | C7H6O4            | 154.12           | DOI:10.13652/j.issn.1003-5788.2017.04.006 |

|                      |             |                                                |        |                                           |
|----------------------|-------------|------------------------------------------------|--------|-------------------------------------------|
| trans-2-Dodecen-1-ol | 126253-42-7 | C <sub>12</sub> H <sub>24</sub> O              | 184.32 | DOI:10.13271/j.mpb.019.006867             |
| trans-2-Undecen-1-ol | 489-41-8    | C <sub>11</sub> H <sub>22</sub> O              | 170.29 | DOI:10.13271/j.mpb.019.006867             |
| Trans-calamenene     | 40772-39-2  | C <sub>15</sub> H <sub>22</sub>                | 202.33 | DOI:10.13271/j.mpb.019.006867             |
| Tridecanal           | 10486-19-8  | C <sub>6</sub> H <sub>12</sub> O               | 198.34 | DOI:10.13271/j.mpb.019.006867             |
| Undecanal            | 112-44-7    | C <sub>5</sub> H <sub>10</sub> O               | 170.29 | DOI:10.13271/j.mpb.019.006867             |
| Ferulic Acid         | 537-98-4    | C <sub>10</sub> H <sub>10</sub> O <sub>4</sub> | 194.18 | DOI:10.13652/j.issn.1003-5788.2017.04.006 |
| Vanillic acid        | 121-34-6    | C <sub>8</sub> H <sub>8</sub> O <sub>4</sub>   | 168.15 | DOI:10.13652/j.issn.1003-5788.2017.04.006 |

---

**Table S2. Potential molecular targets of compounds in *Oryza sativa* L. indica.** In Swiss Target Prediction database, 173 potential molecular targets of 38 compounds were collected.

| Compound                                                  | Target Gene | ChEMBL<br>ID  | Uniprot<br>ID | Probability* | Known actives<br>(3D/2D) |
|-----------------------------------------------------------|-------------|---------------|---------------|--------------|--------------------------|
| Vanillic acid                                             | Akr1c21     | CHEMBL1075270 | Q91WR5        | 0.125076     | 8 / 20                   |
| Hexadecanoic acid,15-methyl-, methyl ester                | Metap2      | CHEMBL1075272 | O08663        | 0.100579     | 17 / 0                   |
| 7,9-Di-tert-butyl-1-oxaspiro(4,5)deca-6,9-diene-2,8-dione | Ctsk        | CHEMBL1075277 | P55097        | 0.100579     | 216 / 0                  |
| Undecanal                                                 | Ephx1       | CHEMBL1075293 | Q9D379        | 0.116739     | 33 / 0                   |
| (2Z)-3-pentyl-2,4-Pentadien-1-ol                          | Ido1        | CHEMBL1075294 | P28776        | 0.043918633  | 9 / 0                    |
| 3-t-Butyl-oct-6-en-1-ol                                   | Prkcq       | CHEMBL1075295 | Q02111        | 0.071787     | 12 / 0                   |
| 3-t-Butyl-oct-6-en-1-ol                                   | Npc1l1      | CHEMBL1075296 | Q6T3U4        | 0.071787     | 0 / 7                    |
| 7,9-Di-tert-butyl-1-oxaspiro(4,5)deca-6,9-diene-2,8-dione | Slc6a9      | CHEMBL1075303 | P28571        | 0.100579     | 26 / 0                   |
| 6,10,14-trimethyl-2-Pentadecanone                         | F2          | CHEMBL1075308 | P19221        | 0.112042     | 59 / 0                   |
| (E)-2-Hexenal                                             | Trpa1       | CHEMBL1075310 | Q8BLA8        | 0.084974     | 4/2                      |
| Undecanal                                                 | Gsk3b       | CHEMBL1075321 | Q9WV60        | 0.116739     | 45 / 0                   |
| Cyclohexanol                                              | Gpbar1      | CHEMBL1255150 | Q80SS6        | 0.074316     | 0 / 16                   |
| 6,10,14-trimethyl-2-Pentadecanone                         | Rorc        | CHEMBL1293231 | P51450        | 0.112042     | 163 / 0                  |
| 7,9-Di-tert-butyl-1-oxaspiro(4,5)deca-6,9-diene-2,8-dione | Grm5        | CHEMBL1641352 | Q3UVX5        | 0.100579     | 365 / 0                  |
| Hexadecanal                                               | Slc5a1      | CHEMBL1744523 | Q9QXI6        | 0.048953     | 82 / 0                   |
| Hexadecanoic acid,15-methyl-, methyl ester                | Pde10a      | CHEMBL1795126 | Q8CA95        | 0.100579     | 459 / 0                  |
| Caffeic acid                                              | Tlr4        | CHEMBL1795167 | Q9QUK6        | 0.071787     | 0 / 20                   |
| Tridecanal                                                | Slpr1       | CHEMBL1914262 | O08530        | 0.001        | 38 / 0                   |
| (2Z)-3-pentyl-2,4-Pentadien-1-ol                          | Hsd17b2     | CHEMBL1914270 | P51658        | 0.043918633  | 58 / 0                   |
| Caffeic acid                                              | Mif         | CHEMBL1926491 | P34884        | 0.08057      | 1 / 1                    |
| Hexadecanoic acid,15-methyl-, methyl ester                | Hsd17b3     | CHEMBL1932905 | P70385        | 0.100579     | 24 / 14                  |
| trans-2-Dodecen-1-ol                                      | Npbwr1      | CHEMBL1938219 | P49681        | 0.001        | 1 / 0                    |
| Hexadecanal                                               | Lgmn        | CHEMBL1949492 | O89017        | 0.001        | 5 / 0                    |
| 7,9-Di-tert-butyl-1-oxaspiro(4,5)deca-6,9-diene-2,8-dione | Mapk9       | CHEMBL2034797 | Q9WTU6        | 0.100579     | 41 / 0                   |
| 7,9-Di-tert-butyl-1-oxaspiro(4,5)deca-6,9-diene-2,8-dione | Pde7a       | CHEMBL2040702 | P70453        | 0.100579     | 53 / 0                   |
| 7,9-Di-tert-butyl-1-oxaspiro(4,5)deca-6,9-diene-2,8-dione | Adora2a     | CHEMBL2115    | Q60613        | 0.100579     | 173 / 0                  |
| Dodecanal                                                 | Adora2a     | CHEMBL2115    | Q60613        | 0.071787     | 97 / 0                   |
| Alpha-copaene                                             | Ppara       | CHEMBL2128    | P23204        | 0.109508     | 1 / 6                    |
| 6,10,14-trimethyl-2-Pentadecanone                         | Tspo        | CHEMBL2149    | P50637        | 0.112042     | 214 / 0                  |
| Vanillic acid                                             | Ca13        | CHEMBL2186    | Q9D6N1        | 0.141787     | 2 / 3                    |
| 6,10,14-trimethyl-2-Pentadecanone                         | Pik3cg      | CHEMBL2189158 | Q9JHG7        | 0.112042     | 64 / 0                   |
| Caffeic acid                                              | Mapk1       | CHEMBL2207    | P63085        | 0.071787     | 0 / 1                    |
| Vanillic acid                                             | Mmp9        | CHEMBL2214    | P41245        | 0.125076     | 2 / 0                    |
| Vanillic acid                                             | Ca7         | CHEMBL2216    | Q9ERQ8        | 0.324628     | 9 / 28                   |
| Heptanal                                                  | Ces2c       | CHEMBL2217    | Q91WG0        | 0.156518     | 0 / 11                   |
| Ferulic Acid                                              | Adora2b     | CHEMBL2237    | Q60614        | 0.031227     | 0 / 1                    |
| 7,9-Di-tert-butyl-1-oxaspiro(4,5)deca-6,9-diene-2,8-dione | Pde4b       | CHEMBL2272    | Q8VBU5        | 0.100579     | 57 / 0                   |
| Chlorogenic acid                                          | Ednra       | CHEMBL2286    | Q61614        | 0.09724      | 0 / 1                    |
| 4-tert-Butylbenzoic acid                                  | Ptgdr2      | CHEMBL2291    | Q9Z2J6        | 0.071787     | 20 / 0                   |
| 4-tert-Butylbenzoic acid                                  | Dao         | CHEMBL2331068 | P18894        | 0.071787     | 2 / 1                    |

|                                                           |        |               |        |             |          |
|-----------------------------------------------------------|--------|---------------|--------|-------------|----------|
| (E,Z)-3,6-Nonadien-1-ol                                   | Mapk14 | CHEMBL2336    | P47811 | 0.023832743 | 70 / 0   |
| 6-methyl-5-Hepten-2-one                                   | Hdac8  | CHEMBL2347    | Q8VH37 | 0.023833    | 1 / 0    |
| 7,9-Di-tert-butyl-1-oxaspiro(4,5)deca-6,9-diene-2,8-dione | Slc6a2 | CHEMBL2370    | O55192 | 0.100579    | 38 / 0   |
| 7,9-Di-tert-butyl-1-oxaspiro(4,5)deca-6,9-diene-2,8-dione | Hcrtr1 | CHEMBL2434819 | P58307 | 0.100579    | 394 / 0  |
| Hexadecanoic acid,15-methyl-, methyl ester                | Ppard  | CHEMBL2458    | P35396 | 0.100579    | 2 / 7    |
| Vanillic acid                                             | Lck    | CHEMBL2480    | P06240 | 0.125076    | 3 / 2    |
| Caffeic acid                                              | Pik3ca | CHEMBL2499    | P42337 | 0.071787    | 0 / 1    |
| (R)-(-)-(Z)-14-methyl-8-hexadecen-1-ol                    | Bche   | CHEMBL2528    | Q03311 | 0.062622    | 1 月 2 日  |
| Chlorogenic acid                                          | Prkca  | CHEMBL2567    | P20444 | 0.09724     | 0 / 198  |
| Hexadecanoic acid,15-methyl-, methyl ester                | Abcb1a | CHEMBL2573    | P21447 | 0.100579    | 10 / 0   |
| 3-t-Butyl-oct-6-en-1-ol                                   | Ptgs1  | CHEMBL2649    | P22437 | 0.071787    | 4 / 2    |
| 6,10,14-trimethyl-2-Pentadecanone                         | Alpl   | CHEMBL2660    | P09242 | 0.112042    | 3 / 0    |
| 6,10,14-trimethyl-2-Pentadecanone                         | Tacr1  | CHEMBL2668    | P30548 | 0.112042    | 152 / 0  |
| Trans-calamenene                                          | Cdc25b | CHEMBL2723    | P30306 | 0.116739    | 8 / 1    |
| Hexadecanoic acid,15-methyl-, methyl ester                | Pdgfrb | CHEMBL2749    | P05622 | 0.100579    | 9 / 0    |
| Hexadecanoic acid,15-methyl-, methyl ester                | Hmgcr  | CHEMBL2764    | Q01237 | 0.100579    | 0 / 23   |
| Hexadecanoic acid,15-methyl-, methyl ester                | Rara   | CHEMBL2792    | P11416 | 0.100579    | 3 / 0    |
| 7,9-Di-tert-butyl-1-oxaspiro(4,5)deca-6,9-diene-2,8-dione | Parp2  | CHEMBL2794    | O88554 | 0.100579    | 27 / 0   |
| 1-Octen-3-ol                                              | Slc6a3 | CHEMBL2799    | Q61327 | 0.054488    | 75 / 0   |
| (R)-(-)-(Z)-14-methyl-8-hexadecen-1-ol                    | Top1   | CHEMBL2814    | Q04750 | 0.053556    | 0 / 2    |
| 6,10,14-trimethyl-2-Pentadecanone                         | Oprm1  | CHEMBL2858    | P42866 | 0.112042    | 56 / 0   |
| 7,9-Di-tert-butyl-1-oxaspiro(4,5)deca-6,9-diene-2,8-dione | Hdac6  | CHEMBL2878    | Q9Z2V5 | 0.100579    | 28 / 0   |
| Undecanal                                                 | Grm1   | CHEMBL2892    | P97772 | 0.125076    | 9 / 0    |
| 7,9-Di-tert-butyl-1-oxaspiro(4,5)deca-6,9-diene-2,8-dione | Dhodh  | CHEMBL2991    | O35435 | 0.100579    | 5 / 0    |
| 7,9-Di-tert-butyl-1-oxaspiro(4,5)deca-6,9-diene-2,8-dione | Ace    | CHEMBL2994    | P09470 | 0.100579    | 4 / 0    |
| Caffeic acid                                              | Esr2   | CHEMBL2995    | O08537 | 0.150924    | 1 月 10 日 |
| Dodecanal                                                 | Htr2c  | CHEMBL3006    | P34968 | 0.071787    | 57 / 0   |
| Chlorogenic acid                                          | Pygl   | CHEMBL3008    | Q9ET01 | 0.09724     | 15 / 1   |
| (E)-2-Octenal                                             | Slc5a7 | CHEMBL3013    | Q8BGY9 | 0.023833    | 1 / 0    |
| 6,10,14-trimethyl-2-Pentadecanone                         | Cnr1   | CHEMBL3037    | P47746 | 0.112042    | 723 / 0  |
| 7,9-Di-tert-butyl-1-oxaspiro(4,5)deca-6,9-diene-2,8-dione | Maob   | CHEMBL3050    | Q8BW75 | 0.100579    | 331 / 0  |
| 1-Nonanol                                                 | Ar     | CHEMBL3056    | P19091 | 0.166712    | 165 / 9  |
| Cyclohexanol                                              | Esr1   | CHEMBL3065    | P19785 | 0.105844    | 0 / 1    |
| (R)-(-)-(Z)-14-methyl-8-hexadecen-1-ol                    | Nr1i3  | CHEMBL3069    | O35627 | 0.153377    | 0 / 3    |
| (E)-2-Nonenal                                             | Rxra   | CHEMBL3084    | P28700 | 0.001       | 0 / 11   |
| 6,10,14-trimethyl-2-Pentadecanone                         | Acaca  | CHEMBL3086    | Q5SWU9 | 0.112042    | 75 / 0   |
| Chlorogenic acid                                          | Mmp2   | CHEMBL3095    | P33434 | 0.172563    | 1 / 6    |
| 6,10,14-trimethyl-2-Pentadecanone                         | Acacb  | CHEMBL3108631 | E9Q4Z2 | 0.112042    | 262 / 0  |
| 1-Nonanol                                                 | Trpm8  | CHEMBL3108632 | Q8R4D5 | 0.166712    | 1 月 1 日  |
| Tridecanal                                                | Gck    | CHEMBL3112387 | P52792 | 0.031227    | 11 / 0   |
| 6,10,14-trimethyl-2-Pentadecanone                         | Ces1d  | CHEMBL3137293 | Q8VCT4 | 0.174863    | 10 / 12  |
| 2,6,6-trimethyl-1-Cyclohexene-1-carboxaldehyde            | Nr3c1  | CHEMBL3144    | P06537 | 0.043919    | 0 / 2    |
| Hexadecanoic acid,15-methyl-, methyl ester                | Tyms   | CHEMBL3160    | P07607 | 0.100579    | 11 / 0   |
| Dodecanal                                                 | Impdh2 | CHEMBL3169    | P24547 | 0.071787    | 24 / 0   |

|                                                           |          |               |        |             |          |
|-----------------------------------------------------------|----------|---------------|--------|-------------|----------|
| 7,9-Di-tert-butyl-1-oxaspiro(4,5)deca-6,9-diene-2,8-dione | Chrm2    | CHEMBL3197    | Q9ERZ4 | 0.100579    | 49 / 0   |
| Cyanidin-3-O-glucoside                                    | Ache     | CHEMBL3198    | P21836 | 0.123138    | 0 / 13   |
| (E,Z)-3,6-Nonadien-1-ol                                   | Ada      | CHEMBL3206    | P03958 | 0.023832743 | 15 / 0   |
| 6,10,14-trimethyl-2-Pentadecanone                         | Oprd1    | CHEMBL3222    | P32300 | 0.112042    | 62 / 0   |
| 7,9-Di-tert-butyl-1-oxaspiro(4,5)deca-6,9-diene-2,8-dione | Tnks     | CHEMBL3232702 | Q6PFX9 | 0.100579    | 38 / 0   |
| 7,9-Di-tert-butyl-1-oxaspiro(4,5)deca-6,9-diene-2,8-dione | Tnks2    | CHEMBL3232703 | Q3UES3 | 0.100579    | 58 / 0   |
| 6,10,14-trimethyl-2-Pentadecanone                         | Nampt    | CHEMBL3259474 | Q99KQ4 | 0.112042    | 113 / 0  |
| 7,9-Di-tert-butyl-1-oxaspiro(4,5)deca-6,9-diene-2,8-dione | Hrh3     | CHEMBL3263    | P58406 | 0.100579    | 40 / 0   |
| 4-tert-Butylbenzoic acid                                  | Rarb     | CHEMBL3266    | P22605 | 0.08057     | 0 / 37   |
| Protocatechuic acid                                       | Comt     | CHEMBL3286068 | O88587 | 0.043919    | 0 / 7    |
| Cyanidin-3-O-glucoside                                    | Rps6ka3  | CHEMBL3297641 | P18654 | 0.114839    | 0 / 19   |
| 7,9-Di-tert-butyl-1-oxaspiro(4,5)deca-6,9-diene-2,8-dione | Ptpn1    | CHEMBL3336    | P35821 | 0.100579    | 19 / 28  |
| 6-methyl-5-Hepten-2-one                                   | Chrna7   | CHEMBL3365    | P49582 | 0.023833    | 1 / 0    |
| 4-tert-Butylbenzoic acid                                  | Kmo      | CHEMBL3407318 | Q91WN4 | 0.071787    | 7 / 0    |
| Undecanal                                                 | Paox     | CHEMBL3408    | Q8C0L6 | 0.116739    | 0 / 1    |
| Hexadecanoic acid,15-methyl-, methyl ester                | Alox5ap  | CHEMBL3414408 | P30355 | 0.100579    | 416 / 0  |
| 5,9,13-trimehtyl-4,8,12-Tetradecatrienal                  | Avpr1a   | CHEMBL3414410 | Q62463 | 0.053556    | 22 / 0   |
| 7,9-Di-tert-butyl-1-oxaspiro(4,5)deca-6,9-diene-2,8-dione | Scn9a    | CHEMBL3414411 | Q62205 | 0.100579    | 35 / 0   |
| Cyanidin-3-O-glucoside                                    | Cd38     | CHEMBL3425388 | P56528 | 0.999915    | 1 / 2    |
| Dodecanal                                                 | Drd2     | CHEMBL3427    | P61168 | 0.071787    | 94 / 0   |
| Hexadecanoic acid,15-methyl-, methyl ester                | Ghsr     | CHEMBL3428    | Q99P50 | 0.100579    | 19 / 0   |
| 2,6,6-trimethyl-1-Cyclohexene-1-carboxaldehyde            | Faah     | CHEMBL3455    | O08914 | 0.072716    | 0 / 14   |
| 2,6,6-trimethyl-1-Cyclohexene-1-carboxaldehyde            | Nos2     | CHEMBL3464    | P29477 | 0.043919    | 6 月 21 日 |
| 2,6,6-trimethyl-1-Cyclohexene-1-carboxaldehyde            | Sigmar1  | CHEMBL3465    | O55242 | 0.082288    | 3 月 3 日  |
| Hexadecanoic acid,15-methyl-, methyl ester                | Abcb1b   | CHEMBL3467    | P06795 | 0.100579    | 10 / 0   |
| 6,10,14-trimethyl-2-Pentadecanone                         | Mdm2     | CHEMBL3600279 | P23804 | 0.112042    | 260 / 0  |
| 7,9-Di-tert-butyl-1-oxaspiro(4,5)deca-6,9-diene-2,8-dione | Egfr     | CHEMBL3608    | Q01279 | 0.100579    | 250 / 0  |
| Chlorogenic acid                                          | Mmp13    | CHEMBL3638350 | P33435 | 0.172563    | 2 / 3    |
| 6,10,14-trimethyl-2-Pentadecanone                         | Ccr5     | CHEMBL3676    | P51682 | 0.112042    | 21 / 0   |
| Dodecanal                                                 | Maoa     | CHEMBL3681    | Q64133 | 0.071787    | 87 / 0   |
| Cyanidin-3-O-glucoside                                    | Adora1   | CHEMBL3688    | Q60612 | 0.106543    | 0 / 7    |
| 6,10,14-trimethyl-2-Pentadecanone                         | Chrm1    | CHEMBL3733    | P12657 | 0.112042    | 96 / 0   |
| Formic acid, 2,4,4-trimethylpentyl ester                  | Parp1    | CHEMBL3740    | P11103 | 0.043919    | 1 / 0    |
| 6,10,14-trimethyl-2-Pentadecanone                         | Npy5r    | CHEMBL3802    | O70342 | 0.112042    | 269 / 0  |
| Hexadecanoic acid,15-methyl-, methyl ester                | Raf1     | CHEMBL3804748 | Q99N57 | 0.100579    | 67 / 0   |
| Hexadecanoic acid,15-methyl-, methyl ester                | Fgfr4    | CHEMBL3839    | Q03142 | 0.100579    | 3 / 0    |
| 6,10,14-trimethyl-2-Pentadecanone                         | Ccr1     | CHEMBL3872    | P51675 | 0.112042    | 89 / 0   |
| Hexadecanoic acid,15-methyl-, methyl ester                | Hsd11b1  | CHEMBL3910    | P50172 | 0.100579    | 278 / 25 |
| 6,10,14-trimethyl-2-Pentadecanone                         | Ptafr    | CHEMBL3993    | Q62035 | 0.112042    | 85 / 0   |
| 7,9-Di-tert-butyl-1-oxaspiro(4,5)deca-6,9-diene-2,8-dione | Hdac1    | CHEMBL4001    | O09106 | 0.100579    | 47 / 0   |
| (E,Z)-3,6-Nonadien-1-ol                                   | Cdk1     | CHEMBL4084    | P11440 | 0.03397069  | 19 / 0   |
| Undecanal                                                 | Ephx2    | CHEMBL4140    | P34914 | 0.125076    | 117 / 0  |
| 4-tert-Butylbenzoic acid                                  | Rarg     | CHEMBL4177    | P18911 | 0.08057     | 0 / 36   |
| 6,10,14-trimethyl-2-Pentadecanone                         | Hsp90aa1 | CHEMBL4197    | P07901 | 0.112042    | 61 / 0   |

|                                                           |          |            |        |          |         |
|-----------------------------------------------------------|----------|------------|--------|----------|---------|
| 6,10,14-trimethyl-2-Pentadecanone                         | Ptgs2    | CHEMBL4321 | Q05769 | 0.112042 | 191 / 0 |
| Dodecanal                                                 | Hrh1     | CHEMBL4322 | P70174 | 0.071787 | 18 / 0  |
| 1-Octen-3-ol                                              | Oprk1    | CHEMBL4329 | P33534 | 0.023833 | 31 / 0  |
| (2Z)-3-pentyl-2,4-Pentadien-1-ol                          | Rxrg     | CHEMBL4402 | P28705 | 0.001    | 0 / 5   |
| Caffeic acid                                              | Hcar2    | CHEMBL4420 | Q9EP66 | 0.08057  | 0 / 1   |
| Hexadecanal                                               | Soat1    | CHEMBL4464 | Q61263 | 0.048953 | 11 / 0  |
| Vanillic acid                                             | Fyn      | CHEMBL4517 | P39688 | 0.125076 | 3 / 1   |
| Chlorogenic acid                                          | Dhfr     | CHEMBL4564 | P00375 | 0.001    | 2 / 0   |
| Vanillic acid                                             | Polb     | CHEMBL4565 | Q8K409 | 0.116739 | 0 / 1   |
| Chlorogenic acid                                          | Bace1    | CHEMBL4593 | P56818 | 0.09724  | 0 / 3   |
| 7,9-Di-tert-butyl-1-oxaspiro(4,5)deca-6,9-diene-2,8-dione | Slc6a4   | CHEMBL4642 | Q60857 | 0.100579 | 45 / 0  |
| 3-Isopropylidene-5-methyl-hex-4-en-2-one                  | Htr7     | CHEMBL4764 | P32304 | 0.053518 | 1 / 0   |
| 3-t-Butyl-oct-6-en-1-ol                                   | Gcgr     | CHEMBL4773 | Q61606 | 0.071787 | 35 / 0  |
| 3-t-Butyl-oct-6-en-1-ol                                   | Kcna3    | CHEMBL4818 | P16390 | 0.071787 | 13 / 0  |
| 7,9-Di-tert-butyl-1-oxaspiro(4,5)deca-6,9-diene-2,8-dione | Taar1    | CHEMBL4908 | Q923Y8 | 0.100579 | 51 / 0  |
| (R)-(-)-(Z)-14-methyl-8-hexadecen-1-ol                    | Prep     | CHEMBL4935 | Q9QUR6 | 0.053556 | 0 / 1   |
| 2,6,6-trimethyl-1-Cyclohexene-1-carboxaldehyde            | Prkch    | CHEMBL4992 | P23298 | 0.053518 | 0 / 1   |
| 7,9-Di-tert-butyl-1-oxaspiro(4,5)deca-6,9-diene-2,8-dione | Scn10a   | CHEMBL5158 | Q6QIY3 | 0.100579 | 18 / 0  |
| 6,10,14-trimethyl-2-Pentadecanone                         | P2rx7    | CHEMBL5183 | Q9Z1M0 | 0.112042 | 204 / 0 |
| 7,9-Di-tert-butyl-1-oxaspiro(4,5)deca-6,9-diene-2,8-dione | Ctsb     | CHEMBL5187 | P10605 | 0.100579 | 109 / 0 |
| Pentadecanal                                              | Cxcr3    | CHEMBL5200 | O88410 | 0.060425 | 8 / 0   |
| Undecanal                                                 | Alox5    | CHEMBL5211 | P48999 | 0.116739 | 23 / 0  |
| 7,9-Di-tert-butyl-1-oxaspiro(4,5)deca-6,9-diene-2,8-dione | Jak3     | CHEMBL5250 | Q62137 | 0.100579 | 127 / 0 |
| (R)-(-)-(Z)-14-methyl-8-hexadecen-1-ol                    | Gpr119   | CHEMBL5263 | Q7TQP3 | 0.053556 | 1 / 0   |
| Hexadecanoic acid,15-methyl-, methyl ester                | Slc22a20 | CHEMBL5269 | Q80UJ1 | 0.100579 | 0 / 5   |
| 3-t-Butyl-oct-6-en-1-ol                                   | Scd1     | CHEMBL5353 | P13516 | 0.071787 | 0 / 1   |
| Vanillic acid                                             | Fbp1     | CHEMBL5360 | Q9QXD6 | 0.125076 | 13 / 0  |
| trans-2-Undecen-1-ol                                      | Cnr2     | CHEMBL5373 | P47936 | 0.116739 | 21 / 1  |
| Cyclohexanol                                              | Shh      | CHEMBL5387 | Q62226 | 0.074316 | 0 / 10  |
| Caffeic acid                                              | Stat3    | CHEMBL5402 | P42227 | 0.071787 | 0 / 1   |
| Hexadecanoic acid,15-methyl-, methyl ester                | Ffar1    | CHEMBL5411 | Q76JU9 | 0.100579 | 5 / 2   |
| 6,10,14-trimethyl-2-Pentadecanone                         | Ccr2     | CHEMBL5412 | P51683 | 0.112042 | 5 / 0   |
| 2,6,6-trimethyl-1-Cyclohexene-1-carboxaldehyde            | Mapk3    | CHEMBL5510 | Q63844 | 0.053518 | 0 / 1   |
| 4-tert-Butylbenzoic acid                                  | Pla2g2d  | CHEMBL5537 | Q9WVF6 | 0.08057  | 0 / 1   |
| 7,9-Di-tert-butyl-1-oxaspiro(4,5)deca-6,9-diene-2,8-dione | Csf1r    | CHEMBL5570 | P09581 | 0.100579 | 46 / 0  |
| 7,9-Di-tert-butyl-1-oxaspiro(4,5)deca-6,9-diene-2,8-dione | Ctsg     | CHEMBL5622 | P28293 | 0.100579 | 5 / 0   |
| Hexadecanoic acid,15-methyl-, methyl ester                | Slc22a6  | CHEMBL5653 | Q8VC69 | 0.100579 | 0 / 2   |
| 7,9-Di-tert-butyl-1-oxaspiro(4,5)deca-6,9-diene-2,8-dione | Hrh4     | CHEMBL5657 | Q91ZY2 | 0.100579 | 25 / 0  |
| Hexadecanoic acid,15-methyl-, methyl ester                | Mcl1     | CHEMBL5768 | P97287 | 0.100579 | 32 / 0  |
| 7,9-Di-tert-butyl-1-oxaspiro(4,5)deca-6,9-diene-2,8-dione | Fap      | CHEMBL5769 | P97321 | 0.100579 | 49 / 0  |
| Protocatechuic acid                                       | Alk      | CHEMBL5771 | P97793 | 0.043919 | 0 / 3   |
| 6,10,14-trimethyl-2-Pentadecanone                         | Mgll     | CHEMBL5774 | O35678 | 0.112042 | 48 / 0  |
| 7,9-Di-tert-butyl-1-oxaspiro(4,5)deca-6,9-diene-2,8-dione | Akt1     | CHEMBL5859 | P31750 | 0.100579 | 14 / 0  |
| Vanillic acid                                             | Ca15     | CHEMBL5973 | Q99N23 | 0.125076 | 4 / 2   |

**Table S3. Summary of AH-Gene Associations.** In DisGeNET database, 656 AH-related genes were obtained.

| Disease   | Gene     | UniProt | DSI_g | DPI_g | Score_gda | First_Ref | Last_Ref |
|-----------|----------|---------|-------|-------|-----------|-----------|----------|
| Hepatitis | IFNG     | P01579  | 0.288 | 0.962 | 0.4       | 1986      | 2020     |
| Hepatitis | FASLG    | P48023  | 0.43  | 0.885 | 0.4       | 2009      | 2009     |
| Hepatitis | ALB      | P02768  | 0.317 | 0.962 | 0.36      | 2006      | 2018     |
| Hepatitis | HMOX1    | P09601  | 0.381 | 0.923 | 0.33      | 2003      | 2019     |
| Hepatitis | CAT      | P04040  | 0.359 | 0.962 | 0.32      | 1991      | 2017     |
| Hepatitis | PARP1    | P09874  | 0.389 | 0.923 | 0.32      | 2010      | 2017     |
| Hepatitis | ATP7B    | P35670  | 0.529 | 0.654 | 0.31      | 2003      | 2007     |
| Hepatitis | SPARC    | P09486  | 0.445 | 0.846 | 0.3       | 2013      | 2013     |
| Hepatitis | ENPP2    | Q13822  | 0.582 | 0.769 | 0.3       | 2007      | 2007     |
| Hepatitis | F2R      | P25116  | 0.444 | 0.846 | 0.3       | 2011      | 2011     |
| Hepatitis | TF       | P02787  | 0.527 | 0.846 | 0.3       | 2011      | 2011     |
| Hepatitis | GZMB     | P10144  | 0.453 | 0.808 | 0.3       | 2009      | 2009     |
| Hepatitis | KEAP1    | Q14145  | 0.475 | 0.808 | 0.3       | 2010      | 2010     |
| Hepatitis | GNMT     | Q14749  | 0.626 | 0.462 | 0.3       | 2010      | 2010     |
| Hepatitis | INS      | P01308  | 0.445 | 0.923 | 0.3       | 2002      | 2002     |
| Hepatitis | FOXP3    | Q9BZS1  | 0.368 | 0.846 | 0.14      | 2011      | 2019     |
| Hepatitis | SERPINA1 | P01009  | 0.41  | 0.923 | 0.14      | 2006      | 2011     |
| Hepatitis | FAS      | P25445  | 0.372 | 0.923 | 0.12      | 2000      | 2003     |
| Hepatitis | STAT1    | P42224  | 0.399 | 0.885 | 0.11      | 2011      | 2011     |
| Hepatitis | CLEC7A   | Q9BXN2  | 0.553 | 0.769 | 0.11      | 2017      | 2017     |
| Hepatitis | TCF4     | P15884  | 0.464 | 0.846 | 0.1       |           |          |
| Hepatitis | CASC15   |         | 0.603 | 0.577 | 0.1       | 2014      | 2014     |
| Hepatitis | GABRG3   | Q99928  | 0.711 | 0.423 | 0.1       | 2014      | 2014     |
| Hepatitis | TCF3     | P15923  | 0.476 | 0.846 | 0.1       |           |          |
| Hepatitis | C1S      | P09871  | 0.705 | 0.462 | 0.1       |           |          |
| Hepatitis | BTK      | Q06187  | 0.464 | 0.808 | 0.1       |           |          |
| Hepatitis | TGFB1    | P01137  | 0.287 | 0.962 | 0.1       | 1995      | 2019     |
| Hepatitis | IRF5     | Q13568  | 0.489 | 0.731 | 0.1       |           |          |
| Hepatitis | TNF      | P01375  | 0.231 | 0.962 | 0.1       | 1999      | 2020     |
| Hepatitis | TP53     | P04637  | 0.236 | 0.962 | 0.1       | 1992      | 2019     |
| Hepatitis | NLRP3    | Q96P20  | 0.361 | 0.962 | 0.1       | 2013      | 2019     |
| Hepatitis | IL17RA   | Q96F46  | 0.529 | 0.808 | 0.1       |           |          |
| Hepatitis | SPIB     | Q01892  | 0.628 | 0.538 | 0.1       |           |          |
| Hepatitis | POU2AF1  | Q16633  | 0.608 | 0.615 | 0.1       |           |          |
| Hepatitis | GLIS3    | Q8NEA6  | 0.59  | 0.654 | 0.1       |           |          |
| Hepatitis | LRRRC8A  | Q8IWT6  | 0.644 | 0.692 | 0.1       |           |          |
| Hepatitis | TTC7A    | Q9ULT0  | 0.641 | 0.577 | 0.1       |           |          |
| Hepatitis | AFP      | P02771  | 0.429 | 0.885 | 0.1       | 2004      | 2019     |
| Hepatitis | ATP7A    | Q04656  | 0.494 | 0.769 | 0.1       |           |          |
| Hepatitis | PIK3R1   | P27986  | 0.477 | 0.885 | 0.1       |           |          |

|           |          |        |       |       |      |      |      |
|-----------|----------|--------|-------|-------|------|------|------|
| Hepatitis | PRKCA    | Q05655 | 0.48  | 0.846 | 0.1  |      |      |
| Hepatitis | PGM1     | P36871 | 0.628 | 0.577 | 0.1  |      |      |
| Hepatitis | TNFSF15  | O95150 | 0.531 | 0.692 | 0.1  |      |      |
| Hepatitis | SKIV2L   | Q15477 | 0.615 | 0.654 | 0.1  |      |      |
| Hepatitis | MST1     | P26927 | 0.465 | 0.885 | 0.1  |      |      |
| Hepatitis | TNPO3    | Q9Y5L0 | 0.663 | 0.577 | 0.1  |      |      |
| Hepatitis | SHPK     | Q9UHI6 | 0.743 | 0.346 | 0.1  |      |      |
| Hepatitis | IL22     | Q9GZX6 | 0.393 | 0.885 | 0.1  | 2004 | 2019 |
| Hepatitis | CYP7A1   | P22680 | 0.576 | 0.615 | 0.1  |      |      |
| Hepatitis | TPP2     | P29144 | 0.729 | 0.462 | 0.1  |      |      |
| Hepatitis | RASGRP1  | O95267 | 0.572 | 0.731 | 0.1  |      |      |
| Hepatitis | ITCH     | Q96J02 | 0.556 | 0.769 | 0.1  |      |      |
| Hepatitis | IL33     | O95760 | 0.409 | 0.885 | 0.1  | 2012 | 2019 |
| Hepatitis | SYT16    | Q17RD7 |       |       | 0.1  | 2014 | 2014 |
| Hepatitis | CASP10   | Q92851 | 0.528 | 0.692 | 0.1  |      |      |
| Hepatitis | IGLL1    | P15814 | 0.678 | 0.538 | 0.1  |      |      |
| Hepatitis | IL17RC   | Q8NAC3 | 0.633 | 0.615 | 0.1  |      |      |
| Hepatitis | CYP7B1   | O75881 | 0.563 | 0.692 | 0.1  |      |      |
| Hepatitis | BLNK     | Q8WV28 | 0.603 | 0.731 | 0.1  |      |      |
| Hepatitis | CD247    | P20963 | 0.539 | 0.731 | 0.1  |      |      |
| Hepatitis | NAV2     | Q8IVL1 | 0.722 | 0.385 | 0.1  | 2014 | 2014 |
| Hepatitis | CD3E     | P07766 | 0.615 | 0.615 | 0.1  |      |      |
| Hepatitis | GUSB     | P08236 | 0.53  | 0.846 | 0.1  |      |      |
| Hepatitis | CD3D     | P04234 | 0.626 | 0.577 | 0.1  |      |      |
| Hepatitis | SLC25A15 | Q9Y619 | 0.711 | 0.346 | 0.1  |      |      |
| Hepatitis | TBX19    | O60806 | 0.695 | 0.462 | 0.1  |      |      |
| Hepatitis | IL1B     | P01584 | 0.276 | 0.962 | 0.1  | 2007 | 2019 |
| Hepatitis | GPT      | P24298 | 0.403 | 0.923 | 0.1  | 1991 | 2019 |
| Hepatitis | IL17F    | Q96PD4 | 0.48  | 0.808 | 0.1  |      |      |
| Hepatitis | IL17A    | Q16552 | 0.324 | 0.923 | 0.1  | 2012 | 2019 |
| Hepatitis | IL12RB1  | P42701 | 0.555 | 0.731 | 0.1  |      |      |
| Hepatitis | IL12A    | P29459 | 0.491 | 0.808 | 0.1  |      |      |
| Hepatitis | IGHM     | P01871 | 0.644 | 0.654 | 0.1  |      |      |
| Hepatitis | TLR4     | O00206 | 0.321 | 0.962 | 0.1  | 2012 | 2019 |
| Hepatitis | CD79B    | P40259 | 0.576 | 0.577 | 0.1  |      |      |
| Hepatitis | IL6      | P05231 | 0.248 | 0.962 | 0.1  | 2006 | 2018 |
| Hepatitis | TRAF3IP2 | O43734 | 0.585 | 0.692 | 0.1  |      |      |
| Hepatitis | GPR35    | Q9HC97 | 0.587 | 0.654 | 0.1  |      |      |
| Hepatitis | CD79A    | P11912 | 0.536 | 0.731 | 0.1  |      |      |
| Hepatitis | XIAP     | P98170 | 0.447 | 0.808 | 0.1  |      |      |
| Hepatitis | MMEL1    | Q495T6 | 0.606 | 0.692 | 0.1  |      |      |
| Hepatitis | SLC17A5  | Q9NRA2 | 0.491 | 0.808 | 0.09 | 2015 | 2019 |
| Hepatitis | PTGS2    | P35354 | 0.314 | 0.962 | 0.08 | 2007 | 2019 |
| Hepatitis | MIR122   |        | 0.468 | 0.808 | 0.08 | 2012 | 2018 |



|           |          |               |       |       |      |      |      |
|-----------|----------|---------------|-------|-------|------|------|------|
| Hepatitis | CYP2E1   | P05181        | 0.459 | 0.885 | 0.07 | 2003 | 2018 |
| Hepatitis | IL4      | P05112        | 0.332 | 0.962 | 0.07 | 1995 | 2019 |
| Hepatitis | IL10     | P22301        | 0.281 | 0.923 | 0.07 | 2001 | 2020 |
| Hepatitis | IFNL3    | Q8IZI9        | 0.506 | 0.808 | 0.07 | 2010 | 2017 |
| Hepatitis | CXCL10   | P02778        | 0.378 | 0.885 | 0.07 | 2000 | 2019 |
| Hepatitis | IL18     | Q14116        | 0.365 | 0.923 | 0.06 | 2002 | 2019 |
| Hepatitis | CCL4     | P13236;Q8NHW4 | 0.466 | 0.923 | 0.06 | 2007 | 2019 |
| Hepatitis | IFNA1    | P01562        | 0.371 | 0.923 | 0.06 | 1988 | 2011 |
| Hepatitis | HLA-DRB1 | P01911        | 0.333 | 0.923 | 0.06 | 1998 | 2009 |
| Hepatitis | HMGB1    | P09429        | 0.368 | 0.923 | 0.05 | 2014 | 2019 |
| Hepatitis | KLRK1    | P26718        | 0.467 | 0.769 | 0.05 | 2007 | 2018 |
| Hepatitis | GOLM1    | Q8NBJ4        | 0.56  | 0.692 | 0.05 | 2000 | 2019 |
| Hepatitis | CD274    | Q9NZQ7        | 0.324 | 0.923 | 0.05 | 2012 | 2018 |
| Hepatitis | IFNA13   | P01562        | 0.374 | 0.923 | 0.05 | 1988 | 2011 |
| Hepatitis | NOS2     | P35228        | 0.364 | 0.923 | 0.05 | 1997 | 2017 |
| Hepatitis | IL1A     | P01583        | 0.333 | 0.962 | 0.05 | 2013 | 2019 |
| Hepatitis | COX2     | P00403        | 0.352 | 0.962 | 0.05 | 2008 | 2019 |
| Hepatitis | SPP1     | P10451        | 0.353 | 0.885 | 0.05 | 2004 | 2012 |
| Hepatitis | VIPR1    | P32241        | 0.573 | 0.654 | 0.05 | 1992 | 2015 |
| Hepatitis | BCL2     | P10415        | 0.291 | 0.885 | 0.05 | 1999 | 2019 |
| Hepatitis | SOCS3    | O14543        | 0.434 | 0.808 | 0.05 | 2006 | 2018 |
| Hepatitis | TLR2     | O60603        | 0.361 | 0.923 | 0.05 | 2012 | 2018 |
| Hepatitis | PDLIM5   | Q96HC4        | 0.525 | 0.808 | 0.05 | 2010 | 2016 |
| Hepatitis | MTCO2P12 |               | 0.368 | 0.962 | 0.04 | 2008 | 2019 |
| Hepatitis | FBL      | P22087        | 0.572 | 0.654 | 0.04 | 2017 | 2019 |
| Hepatitis | TNFSF10  | P50591        | 0.413 | 0.885 | 0.04 | 2008 | 2017 |
| Hepatitis | CCL2     | P13500        | 0.321 | 0.962 | 0.04 | 2017 | 2018 |
| Hepatitis | MYD88    | Q99836        | 0.414 | 0.923 | 0.04 | 2012 | 2019 |
| Hepatitis | GSTM1    | P09488        | 0.38  | 0.923 | 0.04 | 1987 | 2010 |
| Hepatitis | RIPK1    | Q13546        | 0.479 | 0.769 | 0.04 | 2012 | 2017 |
| Hepatitis | IL1RN    | P18510        | 0.373 | 0.923 | 0.04 | 2012 | 2019 |
| Hepatitis | CASP1    | P29466        | 0.413 | 0.885 | 0.04 | 2017 | 2018 |
| Hepatitis | CXCL2    | P19875        | 0.513 | 0.885 | 0.04 | 2011 | 2018 |
| Hepatitis | NAT2     | P11245        | 0.451 | 0.885 | 0.04 | 1997 | 2011 |
| Hepatitis | CXCL8    | P10145        | 0.31  | 0.962 | 0.04 | 2005 | 2017 |
| Hepatitis | LEP      | P41159        | 0.349 | 0.846 | 0.04 | 2010 | 2018 |
| Hepatitis | CTNNB1   | P35222        | 0.303 | 0.885 | 0.04 | 2000 | 2019 |
| Hepatitis | RBM45    | Q8IUH3        | 0.383 | 0.846 | 0.04 | 1998 | 2008 |
| Hepatitis | MIR223   |               | 0.433 | 0.808 | 0.04 | 2015 | 2019 |
| Hepatitis | RIPK3    | Q9Y572        | 0.497 | 0.885 | 0.03 | 2012 | 2019 |
| Hepatitis | GGT1     | P19440        | 0.496 | 0.885 | 0.03 | 2006 | 2019 |
| Hepatitis | GCG      | P01275        | 0.431 | 0.885 | 0.03 | 2014 | 2018 |
| Hepatitis | LGALS3   | P17931        | 0.392 | 0.846 | 0.03 | 2012 | 2019 |
| Hepatitis | IL2      | P60568        | 0.336 | 0.885 | 0.03 | 1995 | 2007 |

|           |             |               |       |       |      |      |      |
|-----------|-------------|---------------|-------|-------|------|------|------|
| Hepatitis | LGALS9      | O00182        | 0.496 | 0.769 | 0.03 | 2012 | 2017 |
| Hepatitis | ABCC2       | Q92887        | 0.483 | 0.808 | 0.03 | 2007 | 2020 |
| Hepatitis | IL27        | Q8NEV9        | 0.457 | 0.808 | 0.03 | 2015 | 2018 |
| Hepatitis | SMAD2       | Q15796        | 0.456 | 0.808 | 0.03 | 2018 | 2019 |
| Hepatitis | SIRT1       | Q96EB6        | 0.378 | 0.885 | 0.03 | 2013 | 2017 |
| Hepatitis | STAT3       | P40763        | 0.32  | 0.923 | 0.03 | 2002 | 2018 |
| Hepatitis | EHMT1       | Q9H9B1        | 0.46  | 0.808 | 0.03 | 2018 | 2018 |
| Hepatitis | IL5         | P05113        | 0.437 | 0.846 | 0.03 | 2007 | 2019 |
| Hepatitis | LGALS1      | P09382        | 0.435 | 0.846 | 0.03 | 2014 | 2020 |
| Hepatitis | IL17D       | Q8TAD2        | 0.464 | 0.808 | 0.03 | 2015 | 2018 |
| Hepatitis | TLR9        | Q9NR96        | 0.411 | 0.885 | 0.03 | 2018 | 2019 |
| Hepatitis | HGF         | P14210        | 0.374 | 0.885 | 0.03 | 1991 | 2019 |
| Hepatitis | GLP1R       | P43220        | 0.471 | 0.846 | 0.03 | 2014 | 2018 |
| Hepatitis | HFE         | Q30201        | 0.436 | 0.846 | 0.03 | 2001 | 2005 |
| Hepatitis | CCN2        | P29279        | 0.399 | 0.846 | 0.03 | 2012 | 2016 |
| Hepatitis | IFNA2       | P01563        | 0.442 | 0.885 | 0.03 | 2001 | 2017 |
| Hepatitis | KLRC4-KLRK1 | P26718        | 0.469 | 0.769 | 0.03 | 2013 | 2018 |
| Hepatitis | HIF1A       | Q16665        | 0.327 | 0.923 | 0.03 | 2008 | 2019 |
| Hepatitis | NFE2L2      | Q16236        | 0.357 | 0.885 | 0.03 | 2017 | 2018 |
| Hepatitis | AGT         | P01019        | 0.367 | 0.923 | 0.03 | 1996 | 2018 |
| Hepatitis | PAEP        | P09466        | 0.43  | 0.846 | 0.03 | 2005 | 2017 |
| Hepatitis | ESRRB       | O95718        | 0.565 | 0.846 | 0.03 | 2017 | 2018 |
| Hepatitis | GSTT1       | P30711        | 0.393 | 0.923 | 0.03 | 2007 | 2013 |
| Hepatitis | TNFRSF9     | Q07011        | 0.502 | 0.769 | 0.02 | 2010 | 2018 |
| Hepatitis | VDR         | P11473        | 0.352 | 0.885 | 0.02 | 2019 | 2019 |
| Hepatitis | CLOCK       | O15516        | 0.463 | 0.885 | 0.02 | 2013 | 2018 |
| Hepatitis | ICAM1       | P05362        | 0.364 | 0.962 | 0.02 | 1992 | 1995 |
| Hepatitis | CD40        | P25942        | 0.396 | 0.846 | 0.02 | 2018 | 2019 |
| Hepatitis | IL13        | P35225        | 0.386 | 0.846 | 0.02 | 2017 | 2019 |
| Hepatitis | HLA-G       | P17693        | 0.461 | 0.769 | 0.02 | 2014 | 2015 |
| Hepatitis | KRT18       | P05783        | 0.53  | 0.692 | 0.02 | 2007 | 2017 |
| Hepatitis | GGTLC4P     |               | 0.513 | 0.846 | 0.02 | 2018 | 2019 |
| Hepatitis | TXN         | P10599        | 0.447 | 0.885 | 0.02 | 2003 | 2006 |
| Hepatitis | CCL4L2      | P13236;Q8NHW4 | 0.535 | 0.885 | 0.02 | 2007 | 2011 |
| Hepatitis | CASP8       | Q14790        | 0.404 | 0.923 | 0.02 | 2012 | 2018 |
| Hepatitis | NR0B2       | Q15466        | 0.474 | 0.808 | 0.02 | 2018 | 2018 |
| Hepatitis | GPT2        | Q8TD30        | 0.65  | 0.577 | 0.02 | 2006 | 2018 |
| Hepatitis | SPAG9       | O60271        | 0.566 | 0.769 | 0.02 | 2017 | 2017 |
| Hepatitis | TNFAIP8L2   | Q6P589        | 0.575 | 0.615 | 0.02 | 2011 | 2017 |
| Hepatitis | APOE        | P02649        | 0.338 | 0.962 | 0.02 | 2002 | 2018 |
| Hepatitis | IFNB1       | P01574        | 0.421 | 0.846 | 0.02 | 2011 | 2019 |
| Hepatitis | GRAP2       | O75791        | 0.394 | 0.923 | 0.02 | 2011 | 2019 |
| Hepatitis | MBOAT7      | Q96N66        | 0.612 | 0.5   | 0.02 | 2016 | 2019 |
| Hepatitis | MANF        | P55145        | 0.621 | 0.654 | 0.02 | 2018 | 2019 |

|           |         |               |       |       |      |      |      |
|-----------|---------|---------------|-------|-------|------|------|------|
| Hepatitis | PTGES   | O14684        | 0.54  | 0.769 | 0.02 | 2007 | 2018 |
| Hepatitis | CCR2    | P41597        | 0.418 | 0.846 | 0.02 | 2017 | 2018 |
| Hepatitis | AHI1    | Q8N157        | 0.513 | 0.846 | 0.02 | 1999 | 2003 |
| Hepatitis | NCKIPSD | Q9NZQ3        | 0.612 | 0.577 | 0.02 | 1999 | 2003 |
| Hepatitis | TLR7    | Q9NYK1        | 0.464 | 0.885 | 0.02 | 2013 | 2019 |
| Hepatitis | RIT2    | Q99578        | 0.647 | 0.538 | 0.02 | 1993 | 1994 |
| Hepatitis | PCSK1   | P29120        | 0.548 | 0.615 | 0.02 | 2012 | 2015 |
| Hepatitis | RNASEL  | Q05823        | 0.579 | 0.692 | 0.02 | 2012 | 2013 |
| Hepatitis | OPN1SW  | P03999        | 0.519 | 0.769 | 0.02 | 2011 | 2015 |
| Hepatitis | NOX4    | Q9NPH5        | 0.471 | 0.885 | 0.02 | 2015 | 2015 |
| Hepatitis | CCL16   | O15467        | 0.686 | 0.5   | 0.02 | 1997 | 1999 |
| Hepatitis | P2RX7   | Q99572        | 0.45  | 0.808 | 0.02 | 2017 | 2019 |
| Hepatitis | RELA    | Q04206        | 0.406 | 0.885 | 0.02 | 2005 | 2007 |
| Hepatitis | PECAM1  | P16284        | 0.426 | 0.846 | 0.02 | 2000 | 2015 |
| Hepatitis | UGT1A1  | P22309        | 0.464 | 0.769 | 0.02 | 2018 | 2018 |
| Hepatitis | PPARA   | Q07869        | 0.432 | 0.885 | 0.02 | 2014 | 2017 |
| Hepatitis | MAPK8   | P45983        | 0.397 | 0.885 | 0.02 | 2016 | 2019 |
| Hepatitis | PON1    | P27169        | 0.409 | 0.885 | 0.02 | 2011 | 2017 |
| Hepatitis | MYDGF   | Q969H8        | 0.451 | 0.846 | 0.02 | 2015 | 2018 |
| Hepatitis | RETN    | Q9HD89        | 0.454 | 0.808 | 0.02 | 2012 | 2014 |
| Hepatitis | KLHL1   | Q9NR64        | 0.569 | 0.654 | 0.02 | 2007 | 2020 |
| Hepatitis | IL21    | Q9HBE4        | 0.441 | 0.769 | 0.02 | 2011 | 2018 |
| Hepatitis | MAPK1   | P28482        | 0.33  | 0.923 | 0.02 | 2011 | 2019 |
| Hepatitis | NOTCH1  | P46531        | 0.369 | 0.885 | 0.02 | 2017 | 2018 |
| Hepatitis | CXCL11  | O14625        | 0.519 | 0.808 | 0.02 | 2015 | 2019 |
| Hepatitis | NFKB1   | P19838        | 0.396 | 0.923 | 0.02 | 2017 | 2018 |
| Hepatitis | LTBR    | P36941        | 0.592 | 0.692 | 0.02 | 2007 | 2017 |
| Hepatitis | EPCAM   | P16422        | 0.451 | 0.885 | 0.02 | 2018 | 2019 |
| Hepatitis | CCL4L1  | P13236;Q8NHW4 | 0.534 | 0.885 | 0.02 | 2007 | 2011 |
| Hepatitis | ADAM17  | P78536        | 0.453 | 0.808 | 0.02 | 2014 | 2016 |
| Hepatitis | GSTK1   | Q9Y2Q3        | 0.412 | 0.885 | 0.02 | 2010 | 2017 |
| Hepatitis | JUN     | P05412        | 0.442 | 0.885 | 0.02 | 2007 | 2013 |
| Hepatitis | ISG20   | Q96AZ6        | 0.414 | 0.846 | 0.02 | 2018 | 2019 |
| Hepatitis | TLR3    | O15455        | 0.427 | 0.885 | 0.02 | 2016 | 2018 |
| Hepatitis | GGTLC3  | B5MD39        | 0.513 | 0.846 | 0.02 | 2018 | 2019 |
| Hepatitis | MIR146A |               | 0.398 | 0.885 | 0.02 | 2017 | 2018 |
| Hepatitis | MIR155  |               | 0.384 | 0.885 | 0.02 | 2013 | 2016 |
| Hepatitis | S100A4  | P26447        | 0.448 | 0.769 | 0.02 | 2018 | 2019 |
| Hepatitis | MYC     | P01106        | 0.344 | 0.923 | 0.02 | 1992 | 2009 |
| Hepatitis | CXCL12  | P48061        | 0.379 | 0.846 | 0.02 | 2003 | 2019 |
| Hepatitis | GGTLC5P |               | 0.513 | 0.846 | 0.02 | 2018 | 2019 |
| Hepatitis | MEFV    | O15553        | 0.44  | 0.885 | 0.02 | 2018 | 2018 |
| Hepatitis | AIMP2   | Q13155        | 0.393 | 0.923 | 0.02 | 2011 | 2019 |
| Hepatitis | SMN1    | Q16637        | 0.454 | 0.769 | 0.02 | 2019 | 2019 |

|           |         |               |       |       |      |      |      |
|-----------|---------|---------------|-------|-------|------|------|------|
| Hepatitis | SMN2    | Q16637        | 0.459 | 0.769 | 0.02 | 2019 | 2019 |
| Hepatitis | MIR29A  |               | 0.459 | 0.808 | 0.02 | 2014 | 2019 |
| Hepatitis | GGT2    | P36268        | 0.513 | 0.846 | 0.02 | 2018 | 2019 |
| Hepatitis | AHSA1   | O95433        | 0.396 | 0.923 | 0.02 | 2011 | 2019 |
| Hepatitis | CDKN2A  | P42771;Q8N726 | 0.3   | 0.885 | 0.02 | 2004 | 2004 |
| Hepatitis | CRK     | P46108        | 0.394 | 0.923 | 0.02 | 2011 | 2019 |
| Hepatitis | IL18BP  | O95998        | 0.603 | 0.731 | 0.02 | 2013 | 2019 |
| Hepatitis | ABCB6   | Q9NP58        | 0.431 | 0.885 | 0.02 | 1997 | 2013 |
| Hepatitis | GABPA   | Q06546        | 0.379 | 0.885 | 0.02 | 2018 | 2018 |
| Hepatitis | GSR     | P00390        | 0.494 | 0.846 | 0.02 | 2017 | 2017 |
| Hepatitis | FCGR2B  | P31994        | 0.522 | 0.846 | 0.02 | 2018 | 2019 |
| Hepatitis | FGL2    | Q14314        | 0.621 | 0.615 | 0.02 | 2005 | 2017 |
| Hepatitis | CXCR3   | P49682        | 0.436 | 0.808 | 0.02 | 2008 | 2015 |
| Hepatitis | IFNL1   | Q8IU54        | 0.599 | 0.654 | 0.02 | 2006 | 2011 |
| Hepatitis | CREB1   | P16220        | 0.463 | 0.885 | 0.02 | 2018 | 2018 |
| Hepatitis | MAPK14  | Q16539        | 0.379 | 0.923 | 0.02 | 2011 | 2019 |
| Hepatitis | SLCO6A1 | Q86UG4        | 0.412 | 0.885 | 0.02 | 2010 | 2017 |
| Hepatitis | EMB     | Q6PCB8        | 0.633 | 0.615 | 0.02 | 1994 | 1994 |
| Hepatitis | AHR     | P35869        | 0.41  | 0.923 | 0.02 | 2014 | 2020 |
| Hepatitis | TXNIP   | Q9H3M7        | 0.49  | 0.731 | 0.02 | 2013 | 2017 |
| Hepatitis | F10     | P00742        | 0.493 | 0.769 | 0.02 | 2005 | 2018 |
| Hepatitis | EPHX1   | P07099        | 0.5   | 0.846 | 0.02 | 2007 | 2009 |
| Hepatitis | RNF19A  | Q9NV58        | 0.397 | 0.923 | 0.02 | 2011 | 2019 |
| Hepatitis | ACE     | P12821        | 0.328 | 0.923 | 0.02 | 2017 | 2019 |
| Hepatitis | CTLA4   | P16410        | 0.369 | 0.923 | 0.02 | 2014 | 2017 |
| Hepatitis | SYCEIL  | A8MT33        | 0.57  | 0.654 | 0.02 | 2007 | 2020 |
| Hepatitis | ZGLP1   | P0C6A0        | 0.512 | 0.808 | 0.02 | 2018 | 2018 |
| Hepatitis | HLA-A   | P04439        | 0.37  | 0.846 | 0.02 | 1981 | 2011 |
| Hepatitis | IL34    | Q6ZMJ4        | 0.56  | 0.769 | 0.02 | 2018 | 2019 |
| Hepatitis | CD24    | P25063        | 0.472 | 0.769 | 0.02 | 2017 | 2018 |
| Hepatitis | EXT1    | Q16394        | 0.522 | 0.769 | 0.02 | 2001 | 2003 |
| Hepatitis | POLDIP2 | Q9Y2S7        | 0.396 | 0.923 | 0.02 | 2011 | 2019 |
| Hepatitis | COL15A1 | P39059        | 0.682 | 0.577 | 0.01 | 2016 | 2016 |
| Hepatitis | CIDEA   | O60543        | 0.751 | 0.269 | 0.01 | 2019 | 2019 |
| Hepatitis | VASN    | Q6EMK4        | 0.722 | 0.269 | 0.01 | 2015 | 2015 |
| Hepatitis | COMP    | P49747        | 0.503 | 0.808 | 0.01 | 2017 | 2017 |
| Hepatitis | IL17RE  | Q8NFR9        | 0.751 | 0.385 | 0.01 | 2017 | 2017 |
| Hepatitis | SOX11   | P35716        | 0.494 | 0.808 | 0.01 | 2016 | 2016 |
| Hepatitis | SON     | P18583        | 0.565 | 0.769 | 0.01 | 2015 | 2015 |
| Hepatitis | SPINT1  | O43278        | 0.57  | 0.577 | 0.01 | 2001 | 2001 |
| Hepatitis | NR2C2   | P49116        | 0.534 | 0.808 | 0.01 | 2018 | 2018 |
| Hepatitis | ACOT7   | O00154        | 0.531 | 0.769 | 0.01 | 2017 | 2017 |
| Hepatitis | TP73    | O15350        | 0.449 | 0.808 | 0.01 | 1999 | 1999 |
| Hepatitis | MAP3K8  | P41279        | 0.516 | 0.846 | 0.01 | 2019 | 2019 |

|           |          |        |       |       |      |      |      |
|-----------|----------|--------|-------|-------|------|------|------|
| Hepatitis | SMPD1    | P17405 | 0.499 | 0.885 | 0.01 | 2017 | 2017 |
| Hepatitis | H3P16    |        | 0.705 | 0.346 | 0.01 | 2005 | 2005 |
| Hepatitis | ACTG1    | P63261 | 0.477 | 0.846 | 0.01 | 2017 | 2017 |
| Hepatitis | MGLL     | Q99685 | 0.564 | 0.731 | 0.01 | 2019 | 2019 |
| Hepatitis | PGLYRP2  | Q96PD5 | 0.805 | 0.231 | 0.01 | 2013 | 2013 |
| Hepatitis | AKR1D1   | P51857 | 0.711 | 0.385 | 0.01 | 2003 | 2003 |
| Hepatitis | H3P10    |        | 0.35  | 0.846 | 0.01 | 2004 | 2004 |
| Hepatitis | H3P40    |        | 0.506 | 0.846 | 0.01 | 2018 | 2018 |
| Hepatitis | MAP3K7   | O43318 | 0.477 | 0.808 | 0.01 | 2018 | 2018 |
| Hepatitis | TAZ      | Q16635 | 0.477 | 0.808 | 0.01 | 2018 | 2018 |
| Hepatitis | SERPINA7 | P05543 | 0.641 | 0.615 | 0.01 | 1988 | 1988 |
| Hepatitis | CCR4     | P51679 | 0.51  | 0.731 | 0.01 | 2020 | 2020 |
| Hepatitis | PLD4     | Q96BZ4 | 0.78  | 0.5   | 0.01 | 2018 | 2018 |
| Hepatitis | MIR602   |        | 0.792 | 0.231 | 0.01 | 2010 | 2010 |
| Hepatitis | TGFA     | P01135 | 0.432 | 0.885 | 0.01 | 2006 | 2006 |
| Hepatitis | CLTC     | Q00610 | 0.558 | 0.769 | 0.01 | 2013 | 2013 |
| Hepatitis | CLU      | P10909 | 0.426 | 0.885 | 0.01 | 2018 | 2018 |
| Hepatitis | SERPINA3 | P01011 | 0.486 | 0.846 | 0.01 | 2017 | 2017 |
| Hepatitis | TGFB2    | P61812 | 0.433 | 0.885 | 0.01 | 2015 | 2015 |
| Hepatitis | BSG      | P35613 | 0.458 | 0.769 | 0.01 | 2019 | 2019 |
| Hepatitis | TRIM21   | P19474 | 0.485 | 0.808 | 0.01 | 2020 | 2020 |
| Hepatitis | RO60     | P10155 | 0.61  | 0.692 | 0.01 | 1999 | 1999 |
| Hepatitis | COL11A2  | P13942 | 0.435 | 0.846 | 0.01 | 2017 | 2017 |
| Hepatitis | CNR1     | P21554 | 0.446 | 0.808 | 0.01 | 2017 | 2017 |
| Hepatitis | TIMP2    | P16035 | 0.425 | 0.846 | 0.01 | 2001 | 2001 |
| Hepatitis | SYT1     | P21579 | 0.412 | 0.846 | 0.01 | 2005 | 2005 |
| Hepatitis | CMKLR1   | Q99788 | 0.612 | 0.692 | 0.01 | 2013 | 2013 |
| Hepatitis | TDO2     | P48775 | 0.599 | 0.654 | 0.01 | 2020 | 2020 |
| Hepatitis | MPPE1    | Q53F39 | 0.736 | 0.346 | 0.01 | 2019 | 2019 |
| Hepatitis | MIR451A  |        | 0.505 | 0.769 | 0.01 | 2019 | 2019 |
| Hepatitis | RHD      | Q02161 | 0.612 | 0.654 | 0.01 | 2017 | 2017 |
| Hepatitis | NCAN     | O14594 | 0.67  | 0.5   | 0.01 | 2013 | 2013 |
| Hepatitis | CSF3     | P09919 | 0.377 | 0.885 | 0.01 | 2018 | 2018 |
| Hepatitis | BRD2     | P25440 | 0.45  | 0.808 | 0.01 | 2019 | 2019 |
| Hepatitis | APOBEC3G | Q9HC16 | 0.653 | 0.346 | 0.01 | 2006 | 2006 |
| Hepatitis | CSE1L    | P55060 | 0.521 | 0.808 | 0.01 | 2001 | 2001 |
| Hepatitis | HCC      |        | 0.644 | 0.423 | 0.01 | 2018 | 2018 |
| Hepatitis | BDH1     | Q02338 | 0.729 | 0.423 | 0.01 | 2015 | 2015 |
| Hepatitis | RRM2     | P31350 | 0.555 | 0.769 | 0.01 | 2010 | 2010 |
| Hepatitis | SORT1    | Q99523 | 0.573 | 0.615 | 0.01 | 2017 | 2017 |
| Hepatitis | ACTB     | P60709 | 0.325 | 0.923 | 0.01 | 2013 | 2013 |
| Hepatitis | RDX      | P35241 | 0.593 | 0.615 | 0.01 | 2020 | 2020 |
| Hepatitis | RARRES2  | Q99969 | 0.519 | 0.731 | 0.01 | 2013 | 2013 |
| Hepatitis | MIR499A  |        | 0.519 | 0.846 | 0.01 | 2018 | 2018 |

|           |              |        |       |       |      |      |      |
|-----------|--------------|--------|-------|-------|------|------|------|
| Hepatitis | SEMA6A       | Q9H2E6 | 0.486 | 0.808 | 0.01 | 2018 | 2018 |
| Hepatitis | COMMD1       | Q8N668 | 0.633 | 0.692 | 0.01 | 2011 | 2011 |
| Hepatitis | PTPN11       | Q06124 | 0.385 | 0.923 | 0.01 | 1992 | 1992 |
| Hepatitis | HAMP         | P81172 | 0.433 | 0.846 | 0.01 | 2018 | 2018 |
| Hepatitis | PTPRO        | Q16827 | 0.656 | 0.423 | 0.01 | 2014 | 2014 |
| Hepatitis | JAM2         | P57087 | 0.736 | 0.462 | 0.01 | 2018 | 2018 |
| Hepatitis | RAG2         | P55895 | 0.507 | 0.769 | 0.01 | 2019 | 2019 |
| Hepatitis | BCHE         | P06276 | 0.447 | 0.923 | 0.01 | 2017 | 2017 |
| Hepatitis | RAP1A        | P62834 | 0.502 | 0.808 | 0.01 | 2016 | 2016 |
| Hepatitis | WNK1         | Q9H4A3 | 0.416 | 0.846 | 0.01 | 2005 | 2005 |
| Hepatitis | S100A9       | P06702 | 0.433 | 0.885 | 0.01 | 2018 | 2018 |
| Hepatitis | IFIH1        | Q9BYX4 | 0.471 | 0.808 | 0.01 | 2015 | 2015 |
| Hepatitis | POTEM        | A6NI47 | 0.541 | 0.769 | 0.01 | 2017 | 2017 |
| Hepatitis | SFPQ         | P23246 | 0.593 | 0.654 | 0.01 | 2007 | 2007 |
| Hepatitis | CPT1B        | Q92523 | 0.653 | 0.538 | 0.01 | 2016 | 2016 |
| Hepatitis | CTNND1       | O60716 | 0.5   | 0.808 | 0.01 | 2001 | 2001 |
| Hepatitis | CPT1A        | P50416 | 0.555 | 0.808 | 0.01 | 2016 | 2016 |
| Hepatitis | GORASP1      | Q9BQQ3 | 0.428 | 0.846 | 0.01 | 2005 | 2005 |
| Hepatitis | DEPTOR       | Q8TB45 | 0.626 | 0.654 | 0.01 | 2016 | 2016 |
| Hepatitis | ST6GAL1      | P15907 | 0.569 | 0.731 | 0.01 | 2017 | 2017 |
| Hepatitis | COX8A        | P10176 | 0.4   | 0.846 | 0.01 | 1997 | 1997 |
| Hepatitis | NOD2         | Q9HC29 | 0.423 | 0.923 | 0.01 | 2008 | 2008 |
| Hepatitis | SAMSN1       | Q9NSI8 | 0.716 | 0.385 | 0.01 | 2015 | 2015 |
| Hepatitis | SELP         | P16109 | 0.46  | 0.769 | 0.01 | 2010 | 2010 |
| Hepatitis | S100B        | P04271 | 0.383 | 0.923 | 0.01 | 2008 | 2008 |
| Hepatitis | SARS1        | P49591 | 0.558 | 0.769 | 0.01 | 2008 | 2008 |
| Hepatitis | SERPINB3     | P29508 | 0.565 | 0.615 | 0.01 | 2012 | 2012 |
| Hepatitis | SERPINB4     | P48594 | 0.623 | 0.423 | 0.01 | 2012 | 2012 |
| Hepatitis | CEACAM1      | P13688 | 0.525 | 0.731 | 0.01 | 2004 | 2004 |
| Hepatitis | CRP          | P02741 | 0.299 | 0.962 | 0.01 | 2010 | 2010 |
| Hepatitis | ATF2         | P15336 | 0.551 | 0.808 | 0.01 | 2018 | 2018 |
| Hepatitis | CCL20        | P78556 | 0.474 | 0.846 | 0.01 | 2002 | 2002 |
| Hepatitis | CPT2         | P23786 | 0.542 | 0.769 | 0.01 | 2016 | 2016 |
| Hepatitis | ERVK-6       |        | 0.521 | 0.808 | 0.01 | 1994 | 1994 |
| Hepatitis | SLC4A1       | P02730 | 0.522 | 0.731 | 0.01 | 2013 | 2013 |
| Hepatitis | TRAF6        | Q9Y4K3 | 0.472 | 0.808 | 0.01 | 2013 | 2013 |
| Hepatitis | TSLP         | Q969D9 | 0.486 | 0.808 | 0.01 | 2007 | 2007 |
| Hepatitis | LOC102724197 |        | 0.559 | 0.731 | 0.01 | 2019 | 2019 |
| Hepatitis | ARTN         | Q5T4W7 | 0.48  | 0.846 | 0.01 | 2019 | 2019 |
| Hepatitis | CDKN1A       | P38936 | 0.403 | 0.769 | 0.01 | 2005 | 2005 |
| Hepatitis | NAMPT        | P43490 | 0.502 | 0.808 | 0.01 | 2015 | 2015 |
| Hepatitis | CD1D         | P15813 | 0.532 | 0.769 | 0.01 | 2004 | 2004 |
| Hepatitis | P2RX6        | O15547 | 0.599 | 0.769 | 0.01 | 2017 | 2017 |
| Hepatitis | ERVK-20      |        | 0.533 | 0.692 | 0.01 | 1994 | 1994 |

|           |               |        |       |       |      |      |      |
|-----------|---------------|--------|-------|-------|------|------|------|
| Hepatitis | MYOM2         | P54296 | 0.57  | 0.692 | 0.01 | 1994 | 1994 |
| Hepatitis | TIMD4         | Q96H15 | 0.644 | 0.654 | 0.01 | 2019 | 2019 |
| Hepatitis | DCLK1         | O15075 | 0.545 | 0.615 | 0.01 | 2015 | 2015 |
| Hepatitis | GGTLC1        | Q9BX51 | 0.559 | 0.731 | 0.01 | 2019 | 2019 |
| Hepatitis | SLAMF9        | Q96A28 | 0.861 | 0.192 | 0.01 | 2020 | 2020 |
| Hepatitis | CCNE1         | P24864 | 0.538 | 0.731 | 0.01 | 2018 | 2018 |
| Hepatitis | SOCS1         | O15524 | 0.445 | 0.808 | 0.01 | 2004 | 2004 |
| Hepatitis | TLR6          | Q9Y2C9 | 0.556 | 0.769 | 0.01 | 2016 | 2016 |
| Hepatitis | CDKN2B        | P42772 | 0.417 | 0.769 | 0.01 | 2009 | 2009 |
| Hepatitis | FADD          | Q13158 | 0.537 | 0.846 | 0.01 | 2006 | 2006 |
| Hepatitis | PROM1         | O43490 | 0.41  | 0.846 | 0.01 | 2015 | 2015 |
| Hepatitis | NR1I2         | O75469 | 0.418 | 0.846 | 0.01 | 2010 | 2010 |
| Hepatitis | ARHGEF7       | Q14155 | 0.486 | 0.846 | 0.01 | 2018 | 2018 |
| Hepatitis | SPHK1         | Q9NYA1 | 0.48  | 0.808 | 0.01 | 2019 | 2019 |
| Hepatitis | SQSTM1        | Q13501 | 0.428 | 0.885 | 0.01 | 2018 | 2018 |
| Hepatitis | DDX18         | Q9NVP1 | 0.805 | 0.192 | 0.01 | 2013 | 2013 |
| Hepatitis | ADAR          | P55265 | 0.501 | 0.808 | 0.01 | 2017 | 2017 |
| Hepatitis | CD5L          | O43866 | 0.593 | 0.846 | 0.01 | 2019 | 2019 |
| Hepatitis | IL32          | P24001 | 0.495 | 0.731 | 0.01 | 2012 | 2012 |
| Hepatitis | PARP2         | Q9UGN5 | 0.663 | 0.538 | 0.01 | 2017 | 2017 |
| Hepatitis | BCAR1         | P56945 | 0.518 | 0.846 | 0.01 | 2001 | 2001 |
| Hepatitis | CD44          | P16070 | 0.363 | 0.962 | 0.01 | 2017 | 2017 |
| Hepatitis | CD58          | P19256 | 0.584 | 0.769 | 0.01 | 2005 | 2005 |
| Hepatitis | CD59          | P13987 | 0.469 | 0.808 | 0.01 | 2013 | 2013 |
| Hepatitis | CD68          | P34810 | 0.408 | 0.808 | 0.01 | 2018 | 2018 |
| Hepatitis | TEC           |        | 0.659 | 0.577 | 0.01 | 2013 | 2013 |
| Hepatitis | CD81          | P60033 | 0.555 | 0.846 | 0.01 | 2001 | 2001 |
| Hepatitis | RIPOR2        | Q9Y4F9 | 0.792 | 0.269 | 0.01 | 2017 | 2017 |
| Hepatitis | ADA           | P00813 | 0.44  | 0.885 | 0.01 | 2017 | 2017 |
| Hepatitis | CDK1          | P06493 | 0.482 | 0.808 | 0.01 | 2019 | 2019 |
| Hepatitis | CXCL14        | O95715 | 0.554 | 0.731 | 0.01 | 2019 | 2019 |
| Hepatitis | MICA          | Q29983 | 0.473 | 0.846 | 0.01 | 2016 | 2016 |
| Hepatitis | MSC           | O60682 | 0.475 | 0.846 | 0.01 | 2014 | 2014 |
| Hepatitis | CD14          | P08571 | 0.392 | 0.885 | 0.01 | 2017 | 2017 |
| Hepatitis | MS4A1         | P11836 | 0.411 | 0.846 | 0.01 | 2019 | 2019 |
| Hepatitis | TCEAL1        | Q15170 | 0.7   | 0.346 | 0.01 | 2005 | 2005 |
| Hepatitis | ADIPOQ        | Q15848 | 0.376 | 0.885 | 0.01 | 2015 | 2015 |
| Hepatitis | P2RX5-TAX1BP3 |        | 0.588 | 0.769 | 0.01 | 2017 | 2017 |
| Hepatitis | CD80          | P33681 | 0.475 | 0.769 | 0.01 | 2019 | 2019 |
| Hepatitis | FADS2         | O95864 | 0.575 | 0.692 | 0.01 | 2017 | 2017 |
| Hepatitis | TMX2-CTNND1   |        | 0.538 | 0.769 | 0.01 | 2001 | 2001 |
| Hepatitis | FHL5          | Q5TD97 | 0.53  | 0.769 | 0.01 | 2017 | 2017 |
| Hepatitis | GDF15         | Q99988 | 0.429 | 0.808 | 0.01 | 2017 | 2017 |
| Hepatitis | SFRP5         | Q5T4F7 | 0.559 | 0.692 | 0.01 | 2017 | 2017 |

|           |              |        |       |       |      |      |      |
|-----------|--------------|--------|-------|-------|------|------|------|
| Hepatitis | ACTG2        | P63267 | 0.505 | 0.808 | 0.01 | 2017 | 2017 |
| Hepatitis | VCAM1        | P19320 | 0.422 | 0.808 | 0.01 | 2005 | 2005 |
| Hepatitis | ERVK-32      |        | 0.522 | 0.692 | 0.01 | 1994 | 1994 |
| Hepatitis | VEGFA        | P15692 | 0.266 | 0.923 | 0.01 | 2017 | 2017 |
| Hepatitis | VIM          | P08670 | 0.372 | 0.846 | 0.01 | 2019 | 2019 |
| Hepatitis | VTN          | P04004 | 0.509 | 0.769 | 0.01 | 2008 | 2008 |
| Hepatitis | XRCC1        | P18887 | 0.421 | 0.923 | 0.01 | 2009 | 2009 |
| Hepatitis | ALDH1L1      | O75891 | 0.663 | 0.615 | 0.01 | 2017 | 2017 |
| Hepatitis | FTO          | Q9C0B1 | 0.486 | 0.885 | 0.01 | 2018 | 2018 |
| Hepatitis | DHX58        | Q96C10 | 0.705 | 0.308 | 0.01 | 2019 | 2019 |
| Hepatitis | CETP         | P11597 | 0.512 | 0.731 | 0.01 | 2018 | 2018 |
| Hepatitis | TNFSF13B     | Q9Y275 | 0.46  | 0.731 | 0.01 | 2017 | 2017 |
| Hepatitis | UROD         | P06132 | 0.521 | 0.769 | 0.01 | 1999 | 1999 |
| Hepatitis | USP4         | Q13107 | 0.686 | 0.308 | 0.01 | 2019 | 2019 |
| Hepatitis | VSIG4        | Q9Y279 | 0.628 | 0.615 | 0.01 | 2018 | 2018 |
| Hepatitis | POTEF        | A5A3E0 | 0.481 | 0.885 | 0.01 | 2013 | 2013 |
| Hepatitis | ESM1         | Q9NQ30 | 0.595 | 0.654 | 0.01 | 2011 | 2011 |
| Hepatitis | HULC         |        | 0.606 | 0.538 | 0.01 | 2017 | 2017 |
| Hepatitis | LOC110806263 |        | 0.464 | 0.731 | 0.01 | 2017 | 2017 |
| Hepatitis | TNFRSF4      | P43489 | 0.547 | 0.692 | 0.01 | 2017 | 2017 |
| Hepatitis | STON1        | Q9Y6Q2 | 0.729 | 0.308 | 0.01 | 2018 | 2018 |
| Hepatitis | GTF2A1L      | Q9UNN4 | 0.678 | 0.385 | 0.01 | 2018 | 2018 |
| Hepatitis | TYRO3        | Q06418 | 0.559 | 0.769 | 0.01 | 2020 | 2020 |
| Hepatitis | UBE2D1       | P51668 | 0.7   | 0.385 | 0.01 | 2018 | 2018 |
| Hepatitis | UMOD         | P07911 | 0.52  | 0.846 | 0.01 | 2018 | 2018 |
| Hepatitis | NELFE        | P18615 | 0.686 | 0.5   | 0.01 | 2012 | 2012 |
| Hepatitis | TFEB         | P19484 | 0.527 | 0.731 | 0.01 | 2018 | 2018 |
| Hepatitis | CASP3        | P42574 | 0.351 | 0.923 | 0.01 | 2012 | 2012 |
| Hepatitis | JAM3         | Q9BX67 | 0.619 | 0.654 | 0.01 | 2018 | 2018 |
| Hepatitis | IVNS1ABP     | Q9Y6Y0 | 0.608 | 0.769 | 0.01 | 1992 | 1992 |
| Hepatitis | SLCO1B1      | Q9Y6L6 | 0.538 | 0.731 | 0.01 | 2012 | 2012 |
| Hepatitis | ARFGEF1      | Q9Y6D6 | 0.674 | 0.423 | 0.01 | 2019 | 2019 |
| Hepatitis | ATG7         | O95352 | 0.505 | 0.769 | 0.01 | 2016 | 2016 |
| Hepatitis | SMARCA5      | O60264 | 0.67  | 0.5   | 0.01 | 2019 | 2019 |
| Hepatitis | TRIM55       | Q9BYV6 | 0.821 | 0.154 | 0.01 | 2018 | 2018 |
| Hepatitis | TRIM63       | Q969Q1 | 0.617 | 0.538 | 0.01 | 2018 | 2018 |
| Hepatitis | MERTK        | Q12866 | 0.531 | 0.692 | 0.01 | 2016 | 2016 |
| Hepatitis | YAP1         | P46937 | 0.432 | 0.808 | 0.01 | 2019 | 2019 |
| Hepatitis | ARHGAP24     | Q8N264 | 0.456 | 0.808 | 0.01 | 1999 | 1999 |
| Hepatitis | SYMPK        | Q92797 | 0.7   | 0.231 | 0.01 | 2019 | 2019 |
| Hepatitis | BIRC7        | Q96CA5 | 0.621 | 0.5   | 0.01 | 2013 | 2013 |
| Hepatitis | CXCR6        | O00574 | 0.448 | 0.885 | 0.01 | 2019 | 2019 |
| Hepatitis | MARCKS       | P29966 | 0.559 | 0.769 | 0.01 | 2005 | 2005 |
| Hepatitis | POSTN        | Q15063 | 0.428 | 0.885 | 0.01 | 2015 | 2015 |



|           |            |               |       |       |      |      |      |
|-----------|------------|---------------|-------|-------|------|------|------|
| Hepatitis | RNF34      | Q969K3        | 0.61  | 0.577 | 0.01 | 2019 | 2019 |
| Hepatitis | HKDC1      | Q2TB90        | 0.743 | 0.269 | 0.01 | 2019 | 2019 |
| Hepatitis | WDR26      | Q9H7D7        | 0.606 | 0.769 | 0.01 | 2017 | 2017 |
| Hepatitis | PNPLA3     | Q9NST1        | 0.556 | 0.692 | 0.01 | 2019 | 2019 |
| Hepatitis | LPAL2      | Q16609        | 0.626 | 0.731 | 0.01 | 2011 | 2011 |
| Hepatitis | CALR       | P27797        | 0.413 | 0.923 | 0.01 | 2020 | 2020 |
| Hepatitis | CDR3       |               | 0.472 | 0.808 | 0.01 | 2013 | 2013 |
| Hepatitis | CDSN       | Q15517        | 0.585 | 0.731 | 0.01 | 2008 | 2008 |
| Hepatitis | BBC3       | Q96PG8;Q9BXH1 | 0.517 | 0.769 | 0.01 | 2010 | 2010 |
| Hepatitis | KLRB1      | Q12918        | 0.601 | 0.615 | 0.01 | 2004 | 2004 |
| Hepatitis | KRT7       | P08729        | 0.463 | 0.808 | 0.01 | 2019 | 2019 |
| Hepatitis | CHKB-CPT1B |               | 0.769 | 0.385 | 0.01 | 2016 | 2016 |
| Hepatitis | GCKR       | Q14397        | 0.604 | 0.615 | 0.01 | 2016 | 2016 |
| Hepatitis | LBP        | P18428        | 0.525 | 0.808 | 0.01 | 2012 | 2012 |
| Hepatitis | LCN2       | P80188        | 0.405 | 0.885 | 0.01 | 2011 | 2011 |
| Hepatitis | LDLR       | P01130        | 0.449 | 0.885 | 0.01 | 1996 | 1996 |
| Hepatitis | COPD       |               | 0.456 | 0.885 | 0.01 | 2019 | 2019 |
| Hepatitis | LEPR       | P48357        | 0.433 | 0.808 | 0.01 | 2010 | 2010 |
| Hepatitis | SETBP1     | Q9Y6X0        | 0.503 | 0.808 | 0.01 | 1995 | 1995 |
| Hepatitis | TIPARP     | Q7Z3E1        | 0.711 | 0.346 | 0.01 | 2020 | 2020 |
| Hepatitis | KIR3DL2    | P43630        | 0.543 | 0.769 | 0.01 | 2016 | 2016 |
| Hepatitis | KIR2DS1    | Q14954        | 0.537 | 0.769 | 0.01 | 2016 | 2016 |
| Hepatitis | LAMP3      | Q9UQV4        | 0.56  | 0.692 | 0.01 | 2017 | 2017 |
| Hepatitis | NSG1       | P42857        | 0.691 | 0.538 | 0.01 | 2005 | 2005 |
| Hepatitis | INSR       | P06213        | 0.432 | 0.846 | 0.01 | 2017 | 2017 |
| Hepatitis | SIGLEC7    | Q9Y286        | 0.535 | 0.846 | 0.01 | 2019 | 2019 |
| Hepatitis | IRS1       | P35568        | 0.488 | 0.769 | 0.01 | 2005 | 2005 |
| Hepatitis | GJA1       | P17302        | 0.393 | 0.885 | 0.01 | 2018 | 2018 |
| Hepatitis | ITGAM      | P11215        | 0.443 | 0.808 | 0.01 | 2018 | 2018 |
| Hepatitis | B4GALT1    | P15291        | 0.674 | 0.538 | 0.01 | 2008 | 2008 |
| Hepatitis | JUNB       | P17275        | 0.467 | 0.769 | 0.01 | 2013 | 2013 |
| Hepatitis | AMELY      | Q99218        | 0.743 | 0.269 | 0.01 | 2010 | 2010 |
| Hepatitis | MALAT1     |               | 0.435 | 0.846 | 0.01 | 2017 | 2017 |
| Hepatitis | LGALS3BP   | Q08380        | 0.546 | 0.769 | 0.01 | 2017 | 2017 |
| Hepatitis | SGMS1      | Q86VZ5        | 0.674 | 0.577 | 0.01 | 2019 | 2019 |
| Hepatitis | LSAMP      | Q13449        | 0.558 | 0.654 | 0.01 | 2017 | 2017 |
| Hepatitis | IPMK       | Q8NFU5        | 0.751 | 0.423 | 0.01 | 2019 | 2019 |
| Hepatitis | FUT8       | Q9BYC5        | 0.603 | 0.692 | 0.01 | 1999 | 1999 |
| Hepatitis | MIR29B1    |               | 0.485 | 0.846 | 0.01 | 2014 | 2014 |
| Hepatitis | MIR29B2    |               | 0.484 | 0.885 | 0.01 | 2014 | 2014 |
| Hepatitis | MIR29C     |               | 0.496 | 0.808 | 0.01 | 2014 | 2014 |
| Hepatitis | MIR96      |               | 0.536 | 0.769 | 0.01 | 2019 | 2019 |
| Hepatitis | MIR98      |               | 0.565 | 0.731 | 0.01 | 2017 | 2017 |
| Hepatitis | SMUG1      | Q53HV7        | 0.322 | 0.923 | 0.01 | 2019 | 2019 |

|           |           |        |       |       |      |      |      |
|-----------|-----------|--------|-------|-------|------|------|------|
| Hepatitis | PIK3R5    | Q8WYR1 | 0.7   | 0.5   | 0.01 | 2019 | 2019 |
| Hepatitis | ARC       | Q7LC44 | 0.573 | 0.769 | 0.01 | 2012 | 2012 |
| Hepatitis | SMAD3     | P84022 | 0.415 | 0.923 | 0.01 | 2019 | 2019 |
| Hepatitis | MIR215    |        | 0.559 | 0.654 | 0.01 | 2014 | 2014 |
| Hepatitis | MIR210    |        | 0.46  | 0.846 | 0.01 | 2014 | 2014 |
| Hepatitis | LTBP2     | Q14767 | 0.572 | 0.692 | 0.01 | 2019 | 2019 |
| Hepatitis | BAMBI     | Q13145 | 0.619 | 0.692 | 0.01 | 2011 | 2011 |
| Hepatitis | MIR106B   |        | 0.523 | 0.808 | 0.01 | 2017 | 2017 |
| Hepatitis | PCSK9     | Q8NBP7 | 0.482 | 0.808 | 0.01 | 2020 | 2020 |
| Hepatitis | MIR139    |        | 0.527 | 0.808 | 0.01 | 2014 | 2014 |
| Hepatitis | MIR143    |        | 0.462 | 0.885 | 0.01 | 2014 | 2014 |
| Hepatitis | MIR145    |        | 0.431 | 0.846 | 0.01 | 2020 | 2020 |
| Hepatitis | REXO1L1P  | Q8IX06 | 0.792 | 0.077 | 0.01 | 1994 | 1994 |
| Hepatitis | MIR196A2  |        | 0.599 | 0.577 | 0.01 | 2017 | 2017 |
| Hepatitis | MIR200A   |        | 0.519 | 0.808 | 0.01 | 2018 | 2018 |
| Hepatitis | MIR203A   |        | 0.471 | 0.808 | 0.01 | 2016 | 2016 |
| Hepatitis | ARRB2     | P32121 | 0.561 | 0.769 | 0.01 | 2014 | 2014 |
| Hepatitis | HLA-DQA1  | P01909 | 0.416 | 0.846 | 0.01 | 2008 | 2008 |
| Hepatitis | APOA2     | P02652 | 0.582 | 0.769 | 0.01 | 2011 | 2011 |
| Hepatitis | APOB      | P04114 | 0.453 | 0.808 | 0.01 | 2007 | 2007 |
| Hepatitis | ERVW-1    | Q9UQF0 | 0.505 | 0.692 | 0.01 | 1994 | 1994 |
| Hepatitis | FFAR4     | Q5NUL3 | 0.621 | 0.577 | 0.01 | 2018 | 2018 |
| Hepatitis | ABCB5     | Q2M3G0 | 0.623 | 0.538 | 0.01 | 2011 | 2011 |
| Hepatitis | GOLGA6A   | Q9NYA3 | 0.592 | 0.654 | 0.01 | 2018 | 2018 |
| Hepatitis | HAS3      | O00219 | 0.644 | 0.692 | 0.01 | 2013 | 2013 |
| Hepatitis | HAS1      | Q92839 | 0.67  | 0.577 | 0.01 | 2013 | 2013 |
| Hepatitis | HABP2     | Q14520 | 0.593 | 0.615 | 0.01 | 2013 | 2013 |
| Hepatitis | APOC3     | P02656 | 0.531 | 0.731 | 0.01 | 2017 | 2017 |
| Hepatitis | TBX21     | Q9UL17 | 0.541 | 0.808 | 0.01 | 2007 | 2007 |
| Hepatitis | BIRC5     | O15392 | 0.495 | 0.731 | 0.01 | 2011 | 2011 |
| Hepatitis | UBE2K     | P61086 | 0.631 | 0.654 | 0.01 | 2011 | 2011 |
| Hepatitis | HLA-C     | P10321 | 0.415 | 0.846 | 0.01 | 2009 | 2009 |
| Hepatitis | HMGA1     | P17096 | 0.494 | 0.769 | 0.01 | 2010 | 2010 |
| Hepatitis | NR4A1     | P22736 | 0.49  | 0.731 | 0.01 | 2017 | 2017 |
| Hepatitis | HNF4A     | P41235 | 0.461 | 0.808 | 0.01 | 2014 | 2014 |
| Hepatitis | HNRNPA1   | P09651 | 0.529 | 0.885 | 0.01 | 1997 | 1997 |
| Hepatitis | HNRNPA2B1 | P22626 | 0.566 | 0.808 | 0.01 | 2010 | 2010 |
| Hepatitis | APBA2     | Q99767 | 0.7   | 0.385 | 0.01 | 2009 | 2009 |
| Hepatitis | APC       | P25054 | 0.373 | 0.962 | 0.01 | 2011 | 2011 |
| Hepatitis | HPGD      | P15428 | 0.516 | 0.731 | 0.01 | 2017 | 2017 |
| Hepatitis | AIRE      | O43918 | 0.516 | 0.808 | 0.01 | 2001 | 2001 |
| Hepatitis | HSF1      | Q00613 | 0.507 | 0.769 | 0.01 | 2019 | 2019 |
| Hepatitis | ACTBL2    | Q562R1 | 0.539 | 0.769 | 0.01 | 2017 | 2017 |
| Hepatitis | ICOS      | Q9Y6W8 | 0.502 | 0.731 | 0.01 | 2015 | 2015 |

|           |               |        |       |       |      |      |      |
|-----------|---------------|--------|-------|-------|------|------|------|
| Hepatitis | ARSH          | Q5FYA8 | 0.695 | 0.577 | 0.01 | 2018 | 2018 |
| Hepatitis | GPR39         | O43194 | 0.65  | 0.615 | 0.01 | 2019 | 2019 |
| Hepatitis | IL4R          | P24394 | 0.474 | 0.846 | 0.01 | 2018 | 2018 |
| Hepatitis | HNF1A-AS1     |        | 0.621 | 0.538 | 0.01 | 2013 | 2013 |
| Hepatitis | IL9           | P15248 | 0.461 | 0.846 | 0.01 | 2018 | 2018 |
| Hepatitis | IL9R          | Q01113 | 0.659 | 0.654 | 0.01 | 2018 | 2018 |
| Hepatitis | GNB3          | P16520 | 0.518 | 0.808 | 0.01 | 2005 | 2005 |
| Hepatitis | GLI2          | P10070 | 0.446 | 0.846 | 0.01 | 2018 | 2018 |
| Hepatitis | IL12B         | P29460 | 0.48  | 0.885 | 0.01 | 2014 | 2014 |
| Hepatitis | HPGDS         | O60760 | 0.388 | 0.923 | 0.01 | 2010 | 2010 |
| Hepatitis | GPC3          | P51654 | 0.466 | 0.808 | 0.01 | 2020 | 2020 |
| Hepatitis | IL17C         | Q9P0M4 | 0.619 | 0.692 | 0.01 | 2017 | 2017 |
| Hepatitis | STON1-GTF2A1L | Q9Y6Q2 | 0.682 | 0.385 | 0.01 | 2018 | 2018 |
| Hepatitis | IL2RA         | P01589 | 0.389 | 0.885 | 0.01 | 2019 | 2019 |
| Hepatitis | IGF1          | P05019 | 0.318 | 0.885 | 0.01 | 2018 | 2018 |
| Hepatitis | GSTP1         | P09211 | 0.383 | 0.923 | 0.01 | 2012 | 2012 |
| Hepatitis | IGFBP7        | Q16270 | 0.476 | 0.769 | 0.01 | 1996 | 1996 |
| Hepatitis | IGH           |        | 0.473 | 0.654 | 0.01 | 2008 | 2008 |
| Hepatitis | APP           | P05067 | 0.422 | 0.846 | 0.01 | 2016 | 2016 |
| Hepatitis | GSPT1         | P15170 | 0.7   | 0.462 | 0.01 | 1987 | 1987 |
| Hepatitis | GSK3B         | P49841 | 0.43  | 0.846 | 0.01 | 2016 | 2016 |
| Hepatitis | NR3C1         | P04150 | 0.393 | 0.885 | 0.01 | 2011 | 2011 |
| Hepatitis | SETD2         | Q9BYW2 | 0.424 | 0.846 | 0.01 | 2017 | 2017 |
| Hepatitis | GRN           | P28799 | 0.435 | 0.846 | 0.01 | 2019 | 2019 |
| Hepatitis | GRB2          | P62993 | 0.546 | 0.769 | 0.01 | 2018 | 2018 |
| Hepatitis | IL37          | Q9NZH6 | 0.459 | 0.846 | 0.01 | 2017 | 2017 |
| Hepatitis | ARID2         | Q68CP9 | 0.543 | 0.808 | 0.01 | 2019 | 2019 |
| Hepatitis | PIK3CB        | P42338 | 0.322 | 0.885 | 0.01 | 2018 | 2018 |
| Hepatitis | PIK3CD        | O00329 | 0.319 | 0.885 | 0.01 | 2018 | 2018 |
| Hepatitis | PIK3CG        | P48736 | 0.32  | 0.885 | 0.01 | 2018 | 2018 |
| Hepatitis | AGRP          | O00253 | 0.488 | 0.769 | 0.01 | 2019 | 2019 |
| Hepatitis | DPP4          | P27487 | 0.42  | 0.808 | 0.01 | 2019 | 2019 |
| Hepatitis | PLP2          | Q04941 | 0.711 | 0.385 | 0.01 | 2008 | 2008 |
| Hepatitis | PML           | P29590 | 0.477 | 0.846 | 0.01 | 1998 | 1998 |
| Hepatitis | DMBT1         | Q9UGM3 | 0.533 | 0.654 | 0.01 | 2012 | 2012 |
| Hepatitis | DLAT          | P10515 | 0.576 | 0.731 | 0.01 | 1997 | 1997 |
| Hepatitis | AFM           | P43652 | 0.59  | 0.731 | 0.01 | 2018 | 2018 |
| Hepatitis | MIR4435-2HG   |        | 0.604 | 0.692 | 0.01 | 2019 | 2019 |
| Hepatitis | PIK3CA        | P42336 | 0.292 | 0.923 | 0.01 | 2018 | 2018 |
| Hepatitis | PIGR          | P01833 | 0.615 | 0.808 | 0.01 | 2011 | 2011 |
| Hepatitis | SIRT6         | Q8N6T7 | 0.496 | 0.846 | 0.01 | 2012 | 2012 |
| Hepatitis | IL23A         | Q9NPF7 | 0.415 | 0.846 | 0.01 | 2017 | 2017 |
| Hepatitis | TDP2          | O95551 | 0.628 | 0.462 | 0.01 | 2019 | 2019 |
| Hepatitis | NBAS          | A2RRP1 | 0.566 | 0.692 | 0.01 | 2018 | 2018 |

|           |          |               |       |       |      |      |      |
|-----------|----------|---------------|-------|-------|------|------|------|
| Hepatitis | PGAM5    | Q96HS1        | 0.711 | 0.5   | 0.01 | 2017 | 2017 |
| Hepatitis | PGF      | P49763        | 0.46  | 0.846 | 0.01 | 2017 | 2017 |
| Hepatitis | ECHS1    | P30084        | 0.601 | 0.654 | 0.01 | 2013 | 2013 |
| Hepatitis | ABCB1    | P08183        | 0.344 | 0.885 | 0.01 | 2012 | 2012 |
| Hepatitis | ABCB4    | P21439        | 0.529 | 0.615 | 0.01 | 2014 | 2014 |
| Hepatitis | PHB      | P35232        | 0.511 | 0.846 | 0.01 | 2020 | 2020 |
| Hepatitis | ATN1     | P54259        | 0.409 | 0.885 | 0.01 | 2011 | 2011 |
| Hepatitis | TREM2    | Q9NZC2        | 0.519 | 0.769 | 0.01 | 2017 | 2017 |
| Hepatitis | TREM1    | Q9NP99        | 0.515 | 0.808 | 0.01 | 2016 | 2016 |
| Hepatitis | POLD1    | P28340        | 0.507 | 0.769 | 0.01 | 2019 | 2019 |
| Hepatitis | CYP2C9   | P11712        | 0.506 | 0.885 | 0.01 | 2000 | 2000 |
| Hepatitis | CYP2C19  | P33261        | 0.467 | 0.846 | 0.01 | 2014 | 2014 |
| Hepatitis | CYP2B6   | P20813        | 0.428 | 0.846 | 0.01 | 1993 | 1993 |
| Hepatitis | CYP2A6   | P11509        | 0.556 | 0.731 | 0.01 | 2003 | 2003 |
| Hepatitis | B2M      | P61769        | 0.447 | 0.846 | 0.01 | 1993 | 1993 |
| Hepatitis | CYP1B1   | Q16678        | 0.457 | 0.769 | 0.01 | 2017 | 2017 |
| Hepatitis | SLAMF8   | Q9P0V8        | 0.839 | 0.154 | 0.01 | 2020 | 2020 |
| Hepatitis | CHPT1    | Q8WUD6        | 0.474 | 0.846 | 0.01 | 2016 | 2016 |
| Hepatitis | CX3CR1   | P49238        | 0.457 | 0.885 | 0.01 | 2019 | 2019 |
| Hepatitis | PTEN     | P60484        | 0.305 | 0.923 | 0.01 | 2017 | 2017 |
| Hepatitis | PTGS1    | P23219        | 0.46  | 0.885 | 0.01 | 2007 | 2007 |
| Hepatitis | PBK      | Q96KB5        | 0.541 | 0.769 | 0.01 | 2019 | 2019 |
| Hepatitis | CYP3A4   | P08684        | 0.462 | 0.885 | 0.01 | 2013 | 2013 |
| Hepatitis | DECR1    | Q16698        | 0.426 | 0.885 | 0.01 | 2019 | 2019 |
| Hepatitis | KRT20    | P35900        | 0.388 | 0.846 | 0.01 | 2019 | 2019 |
| Hepatitis | DDX3X    | O00571        | 0.537 | 0.769 | 0.01 | 2006 | 2006 |
| Hepatitis | RHOF     | Q9HBH0        | 0.638 | 0.5   | 0.01 | 2019 | 2019 |
| Hepatitis | DDX56    | Q9NY93        | 0.695 | 0.308 | 0.01 | 2006 | 2006 |
| Hepatitis | CYP27A1  | Q02318        | 0.538 | 0.731 | 0.01 | 2002 | 2002 |
| Hepatitis | PPARG    | P37231        | 0.358 | 0.885 | 0.01 | 2013 | 2013 |
| Hepatitis | CYP19A1  | P11511        | 0.41  | 0.885 | 0.01 | 2011 | 2011 |
| Hepatitis | SARS2    | Q9NP81        | 0.57  | 0.692 | 0.01 | 2008 | 2008 |
| Hepatitis | RCBTB1   | Q8NDN9        | 0.572 | 0.692 | 0.01 | 2018 | 2018 |
| Hepatitis | MIR429   |               | 0.544 | 0.731 | 0.01 | 2018 | 2018 |
| Hepatitis | CUX1     | P39880;Q13948 | 0.465 | 0.846 | 0.01 | 2019 | 2019 |
| Hepatitis | SMAD7    | O15105        | 0.47  | 0.769 | 0.01 | 2019 | 2019 |
| Hepatitis | MPO      | P05164        | 0.377 | 0.923 | 0.01 | 2017 | 2017 |
| Hepatitis | POTEKP   | Q9BYX7        | 0.542 | 0.769 | 0.01 | 2017 | 2017 |
| Hepatitis | MIR328   |               | 0.558 | 0.769 | 0.01 | 2018 | 2018 |
| Hepatitis | MSD      |               | 0.674 | 0.654 | 0.01 | 2011 | 2011 |
| Hepatitis | KDM6B    | O15054        | 0.514 | 0.808 | 0.01 | 2017 | 2017 |
| Hepatitis | COLGALT2 | Q8IYK4        | 0.805 | 0.269 | 0.01 | 2018 | 2018 |
| Hepatitis | CYTB     | P00156        | 0.529 | 0.808 | 0.01 | 2018 | 2018 |
| Hepatitis | MTHFR    | P42898        | 0.337 | 0.885 | 0.01 | 2014 | 2014 |

|           |         |        |       |       |      |      |      |
|-----------|---------|--------|-------|-------|------|------|------|
| Hepatitis | MTTP    | P55157 | 0.505 | 0.846 | 0.01 | 2017 | 2017 |
| Hepatitis | KIF1B   | O60333 | 0.516 | 0.808 | 0.01 | 2012 | 2012 |
| Hepatitis | MYCN    | P04198 | 0.454 | 0.808 | 0.01 | 1990 | 1990 |
| Hepatitis | CD200   | P41217 | 0.529 | 0.769 | 0.01 | 2018 | 2018 |
| Hepatitis | MMP13   | P45452 | 0.452 | 0.923 | 0.01 | 2020 | 2020 |
| Hepatitis | MAS1    | P04201 | 0.533 | 0.769 | 0.01 | 2011 | 2011 |
| Hepatitis | MBL2    | P11226 | 0.39  | 0.846 | 0.01 | 2008 | 2008 |
| Hepatitis | MDM2    | Q00987 | 0.362 | 0.846 | 0.01 | 2009 | 2009 |
| Hepatitis | FLT3LG  | P49771 | 0.564 | 0.577 | 0.01 | 2017 | 2017 |
| Hepatitis | MGMT    | P16455 | 0.412 | 0.885 | 0.01 | 2003 | 2003 |
| Hepatitis | CD99    | P14209 | 0.491 | 0.731 | 0.01 | 2002 | 2002 |
| Hepatitis | MIF     | P14174 | 0.412 | 0.885 | 0.01 | 2006 | 2006 |
| Hepatitis | CXCL9   | Q07325 | 0.462 | 0.808 | 0.01 | 2015 | 2015 |
| Hepatitis | MLH1    | P40692 | 0.399 | 0.808 | 0.01 | 2003 | 2003 |
| Hepatitis | NR3C2   | P08235 | 0.469 | 0.846 | 0.01 | 1995 | 1995 |
| Hepatitis | MMP9    | P14780 | 0.305 | 0.923 | 0.01 | 2018 | 2018 |
| Hepatitis | P2RX2   | Q9UBL9 | 0.585 | 0.769 | 0.01 | 2017 | 2017 |
| Hepatitis | NCAM1   | P13591 | 0.415 | 0.885 | 0.01 | 2004 | 2004 |
| Hepatitis | FCGR3B  | O75015 | 0.452 | 0.962 | 0.01 | 2018 | 2018 |
| Hepatitis | P2RY1   | P47900 | 0.551 | 0.769 | 0.01 | 2017 | 2017 |
| Hepatitis | P2RY2   | P41231 | 0.543 | 0.808 | 0.01 | 2017 | 2017 |
| Hepatitis | F9      | P00740 | 0.465 | 0.885 | 0.01 | 2013 | 2013 |
| Hepatitis | F2      | P00734 | 0.415 | 0.885 | 0.01 | 2008 | 2008 |
| Hepatitis | PC      | P11498 | 0.515 | 0.808 | 0.01 | 2019 | 2019 |
| Hepatitis | ESR1    | P03372 | 0.324 | 0.962 | 0.01 | 2009 | 2009 |
| Hepatitis | ASCC1   | Q8N9N2 | 0.495 | 0.846 | 0.01 | 2018 | 2018 |
| Hepatitis | NDUFA13 | Q9P0J0 | 0.556 | 0.692 | 0.01 | 2017 | 2017 |
| Hepatitis | CPA4    | Q9UI42 | 0.633 | 0.5   | 0.01 | 2017 | 2017 |
| Hepatitis | EPHA1   | P21709 | 0.544 | 0.731 | 0.01 | 2011 | 2011 |
| Hepatitis | MLKL    | Q8NB16 | 0.57  | 0.731 | 0.01 | 2016 | 2016 |
| Hepatitis | P2RX5   | Q93086 | 0.548 | 0.769 | 0.01 | 2017 | 2017 |
| Hepatitis | P2RX4   | Q99571 | 0.547 | 0.808 | 0.01 | 2017 | 2017 |
| Hepatitis | FCGR3A  | P08637 | 0.432 | 0.962 | 0.01 | 2018 | 2018 |
| Hepatitis | NGF     | P01138 | 0.391 | 0.885 | 0.01 | 2019 | 2019 |
| Hepatitis | NM      |        | 0.473 | 0.808 | 0.01 | 2018 | 2018 |
| Hepatitis | CNOT3   | O75175 | 0.686 | 0.615 | 0.01 | 2020 | 2020 |
| Hepatitis | ALDH2   | P05091 | 0.457 | 0.885 | 0.01 | 2019 | 2019 |
| Hepatitis | OGG1    | O15527 | 0.453 | 0.808 | 0.01 | 2012 | 2012 |
| Hepatitis | OPRM1   | P35372 | 0.457 | 0.808 | 0.01 | 2007 | 2007 |
| Hepatitis | OTC     | P00480 | 0.565 | 0.846 | 0.01 | 2017 | 2017 |
| Hepatitis | OXA1L   | Q15070 | 0.59  | 0.731 | 0.01 | 2018 | 2018 |
| Hepatitis | P2RX1   | P51575 | 0.584 | 0.808 | 0.01 | 2017 | 2017 |
| Hepatitis | P2RX3   | P56373 | 0.565 | 0.769 | 0.01 | 2017 | 2017 |
| Hepatitis | PDCD1   | Q15116 | 0.402 | 0.402 | 0.01 | 2011 | 2011 |
